# Supplementary material for: Numerical Study of the Performance and Emission of a Diesel‐Syngas Dual Fuel Engine
Source: Hindawi journal article supplement (doi:10.1155/2017/6825079), 2017-01-01
Supplement: f1 [file 6825079.f1.docx]

ELEMENTS

C H N O AR

HE

END

SPECIES

H H2 O O2 OH

H2O N2 HO2 H2O2 AR

CO CO2 CH2O HCO HO2CHO

O2CHO HOCHO OCHO HOCH2O CH3O

CH3O2H CH3O2 CH4 CH3 CH2

CH2(S) C2H6 C2H5 C2H4 C2H3

C2H2 CH3CHO CH3CO CH2CHO CH2CO

HCCO CH3CO3H CH3CO3 CH3CO2 C2H5O2

C2H4O1-2 C2H3O1-2 CH3COCH2 C2H3CHO C2H3CO

C2H5CHO C2H5CO HE NC3H7 C3H6

C3H5-A C3H5-S C3H5-T C3H4-A C3H5O

C3H6OOH1-2 C3H6OOH1-3 C3H6OOH1-2O2 C3H6OOH1-3O2 NC3H7O2

C3H6O1-3 C3KET12 C3KET13 CH3CHCO C4H8-1

C4H8-2 PC4H9 C4H71-3 C4H71-4 C4H6

PC4H9O2 C4H8OOH1-3 C2H5COCH2 CH2CH2COCH3 CH3CHCOCH3

C2H3COCH3 NC3H7CHO NC3H7CO SC3H5CO C5H11-1

C5H11-2 C5H10-1 C5H81-3 C5H91-3 C5H11O2-1

C5H10OOH1-4 C5H10O1-4 C6H13-1 C6H13-2 C6H12-1

C6H12-2 C6H111-3 C6H112-4 C6H112-5 C6H112-6

C6H113-1 C6H13O2-1 NC4H9CHO NC4H9CO NC3H7COCH2

NC7H16 C7H15-1 C7H15-2 C7H15-3 C7H15-4

C7H14-1 C7H14-2 C7H14-3 C7H132-4 C7H133-5

C7H13O2-4 C7H15O2-1 C7H15O2-2 C7H15O2-3 C7H15O2-4

C7H15O-3 C7H14OOH1-3 C7H14OOH1-4 C7H14OOH2-3 C7H14OOH2-4

C7H14OOH2-5 C7H14OOH3-1 C7H14OOH3-5 C7H14OOH3-6 C7H14OOH4-1

C7H14OOH4-2 C7H14OOH1-3O2 C7H14OOH2-4O2 C7H14OOH2-5O2 C7H14OOH3-1O2

C7H14OOH3-5O2 C7H14OOH4-2O2 C7H14O1-3 C7H14O1-4 C7H14O2-4

C7H14O2-5 C7H14O3-5 NC7KET13 NC7KET24 NC7KET25

NC7KET31 NC7KET35 NC7KET42 NC4H9COCH2 C4H7OOH1-4

C4H7O1-4 C5H9OOH1-4 C5H9O1-4 C5H9OOH1-5 C5H9O1-5

C6H101-3 C6H101-4 C6H102-4 ETES1 C6H112O2-4

C6H112O2-5 C6H102OOH5-4 C6H102OOH4-5

N N2O NO NO2

END

REACTIONS MOLES CAL/MOLE

H+O2=O+OH 3.547E15 -0.406 1.66E4

REV/1.027E13 -1.5E-2 -1.33E2/

O+H2=H+OH 5.08E4 2.67 6.292E3

REV/2.637E4 2.651E0 4.88E3/

OH+H2=H+H2O 2.16E8 1.51 3.43E3

REV/2.29E9 1.404E0 1.832E4/

O+H2O=2OH 2.97E6 2.02 1.34E4

REV/1.454E5 2.107E0 -2.904E3/

H2+M=2H+M 4.577E19 -1.4 1.044E5

H2/2.5/

H2O/12.0/

CO/1.9/

CO2/3.8/

REV/1.145E20 -1.676E0 8.2E2/

O2+M=2O+M 4.42E17 -0.634 1.189E5

H2/2.5/

H2O/12.0/

AR/0.83/

CO/1.9/

CO2/3.8/

CH4/2.0/

C2H6/3.0/

HE/0.83/

REV/6.165E15 -5.0E-1 0.0E0/

OH+M=O+H+M 9.78E17 -0.743 1.021E5

H2/2.5/

H2O/12.0/

AR/0.75/

CO/1.5/

CO2/2.0/

CH4/2.0/

C2H6/3.0/

HE/0.75/

REV/4.714E18 -1.0E0 0.0E0/

H2O+M=H+OH+M 1.907E23 -1.83 1.185E5

H2/0.73/

H2O/12.0/

AR/0.38/

CH4/2.0/

C2H6/3.0/

HE/0.38/

REV/4.5E22 -2.0E0 0.0E0/

H+O2(+M)=HO2(+M) 1.475E12 0.6 0.0E0

H2/1.3/

H2O/14.0/

AR/0.67/

CO/1.9/

CO2/3.8/

CH4/2.0/

C2H6/3.0/

HE/0.67/

LOW/3.482E16 -4.11E-1 -1.115E3/

TROE/5.0E-1 1.0E-30 1.0E30 1.0E10/

HO2+H=H2+O2 1.66E13 0.0 8.23E2

REV/3.166E12 3.48E-1 5.551E4/

HO2+H=2OH 7.079E13 0.0 2.95E2

REV/2.028E10 7.2E-1 3.684E4/

HO2+O=OH+O2 3.25E13 0.0 0.0E0

REV/3.217E12 3.29E-1 5.328E4/

HO2+OH=H2O+O2 1.973E10 0.962 -3.284E2

REV/3.989E10 1.204E0 6.925E4/

H2O2+O2=2HO2 1.136E16 -0.347 4.973E4

REV/1.03E14 0.0E0 1.104E4/

DUP

H2O2+O2=2HO2 2.141E13 -0.347 3.728E4

REV/1.94E11 0.0E0 -1.409E3/

DUP

H2O2(+M)=2OH(+M) 2.951E14 0.0 4.843E4

H2/2.5/

H2O/12.0/

AR/0.64/

CO/1.9/

CO2/3.8/

CH4/2.0/

C2H6/3.0/

HE/0.64/

LOW/1.202E17 0.0E0 4.55E4/

TROE/5.0E-1 1.0E-30 1.0E30 1.0E10/

H2O2+H=H2O+OH 2.41E13 0.0 3.97E3

REV/1.265E8 1.31E0 7.141E4/

H2O2+H=H2+HO2 2.15E10 1.0 6.0E3

REV/3.716E7 1.695E0 2.2E4/

H2O2+O=OH+HO2 9.55E6 2.0 3.97E3

REV/8.568E3 2.676E0 1.856E4/

H2O2+OH=H2O+HO2 2.0E12 0.0 4.272E2

REV/3.665E10 5.89E-1 3.132E4/

DUP

H2O2+OH=H2O+HO2 1.7E18 0.0 2.941E4

REV/3.115E16 5.89E-1 6.03E4/

DUP

CO+O(+M)=CO2(+M) 1.8E10 0.0 2.384E3

H2/2.0/

O2/6.0/

H2O/6.0/

AR/0.5/

CO/1.5/

CO2/3.5/

CH4/2.0/

C2H6/3.0/

HE/0.5/

LOW/1.35E24 -2.788E0 4.191E3/

CO+O2=CO2+O 1.05E12 0.0 4.254E4

REV/8.035E15 -8.0E-1 5.123E4/

CO+OH=CO2+H 2.23E5 1.89 -1.158E3

REV/5.896E11 6.99E-1 2.426E4/

CO+HO2=CO2+OH 3.01E13 0.0 2.3E4

REV/2.28E16 -4.7E-1 8.497E4/

HCO+M=H+CO+M 4.75E11 0.66 1.487E4

H2/2.0/

H2O/12.0/

CO/1.5/

CO2/2.0/

CH4/2.0/

C2H6/3.0/

REV/3.582E10 1.041E0 -4.573E2/

HCO+O2=CO+HO2 7.58E12 0.0 4.1E2

REV/1.198E12 3.09E-1 3.395E4/

HCO+H=CO+H2 7.34E13 0.0 0.0E0

REV/2.212E12 6.56E-1 8.823E4/

HCO+O=CO+OH 3.02E13 0.0 0.0E0

REV/4.725E11 6.38E-1 8.682E4/

HCO+O=CO2+H 3.0E13 0.0 0.0E0

REV/1.241E18 -5.53E-1 1.122E5/

HCO+OH=CO+H2O 1.02E14 0.0 0.0E0

REV/3.259E13 5.51E-1 1.031E5/

HCO+CH3=CH4+CO 2.65E13 0.0 0.0E0

REV/7.286E14 2.11E-1 8.977E4/

HCO+HO2=CH2O+O2 2.499E14 -0.061 1.392E4

REV/8.07E15 0.0E0 5.342E4/

HCO+HO2=>CO2+H+OH 3.0E13 0.0 0.0E0

O2CHO=HCO+O2 9.959E15 -1.126 4.1E4

REV/1.2E11 0.0E0 -1.1E3/

CH2O+O2CHO=HCO+HO2CHO 1.99E12 0.0 1.166E4

REV/3.908E14 -9.09E-1 1.181E4/

HO2CHO=OCHO+OH 5.01E14 0.0 4.015E4

REV/3.856E8 1.532E0 -6.372E3/

OCHO+M=H+CO2+M 5.318E14 -0.353 1.758E4

REV/7.5E13 0.0E0 2.9E4/

CH2O+CO=2HCO 9.186E13 0.37 7.304E4

REV/1.8E13 0.0E0 0.0E0/

2HCO=>H2+2CO 3.0E12 0.0 0.0E0

HCO+H(+M)=CH2O(+M) 1.09E12 0.48 -2.6E2

H2/2.0/

H2O/6.0/

AR/0.7/

CO/1.5/

CO2/2.0/

CH4/2.0/

C2H6/3.0/

HE/0.7/

LOW/1.35E24 -2.57E0 1.425E3/

TROE/7.824E-1 2.71E2 2.755E3 6.57E3/

CO+H2(+M)=CH2O(+M) 4.3E7 1.5 7.96E4

H2/2.0/

H2O/6.0/

AR/0.7/

CO/1.5/

CO2/2.0/

CH4/2.0/

C2H6/3.0/

HE/0.7/

LOW/5.07E27 -3.42E0 8.4348E4/

TROE/9.32E-1 1.97E2 1.54E3 1.03E4/

CH2O+OH=HCO+H2O 7.82E7 1.63 -1.055E3

REV/4.896E6 1.811E0 2.903E4/

CH2O+H=HCO+H2 5.74E7 1.9 2.74E3

REV/3.39E5 2.187E0 1.793E4/

CH2O+O=HCO+OH 6.26E9 1.15 2.26E3

REV/1.919E7 1.418E0 1.604E4/

CH2O+CH3=HCO+CH4 3.83E1 3.36 4.312E3

REV/2.063E2 3.201E0 2.104E4/

CH2O+HO2=HCO+H2O2 7.1E-3 4.517 6.58E3

REV/2.426E-2 4.108E0 5.769E3/

HOCH2O=CH2O+OH 2.056E21 -2.336 2.573E4

REV/4.5E15 -1.1E0 0.0E0/

HOCH2O=HOCHO+H 1.0E14 0.0 1.49E4

REV/1.123E15 -2.95E-1 1.15E4/

HOCHO=CO+H2O 2.45E12 0.0 6.047E4

REV/2.255E3 2.093E0 5.289E4/

HOCHO=CO2+H2 2.95E9 0.0 4.852E4

REV/6.772E5 1.008E0 5.147E4/

HOCHO=HCO+OH 3.471E22 -1.542 1.107E5

REV/1.0E14 0.0E0 0.0E0/

HOCHO+O2=OCHO+HO2 4.101E12 -0.308 5.988E4

REV/3.5E10 0.0E0 -3.275E3/

HOCHO+OH=>H2O+CO2+H 2.62E6 2.06 9.16E2

HOCHO+OH=>H2O+CO+OH 1.85E7 1.51 -9.62E2

HOCHO+H=>H2+CO2+H 4.24E6 2.1 4.868E3

HOCHO+H=>H2+CO+OH 6.03E13 -0.35 2.988E3

HOCHO+CH3=>CH4+CO+OH 3.9E-7 5.8 2.2E3

HOCHO+HO2=OCHO+H2O2 2.549E12 0.04 3.447E4

REV/2.4E12 0.0E0 1.0E4/

HOCHO+HO2=>H2O2+CO+OH 1.0E12 0.0 1.192E4

HOCHO+O=>CO+2OH 1.77E18 -1.9 2.975E3

HOCHO+HCO=CH2O+OCHO 8.584E11 0.04 2.675E4

REV/5.6E12 0.0E0 1.36E4/

CH3O(+M)=CH2O+H(+M) 6.8E13 0.0 2.617E4

H2/2.0/

H2O/6.0/

CO/1.5/

CO2/2.0/

CH4/2.0/

C2H6/3.0/

LOW/1.867E25 -3.0E0 2.4307E4/

TROE/9.0E-1 2.5E3 1.3E3 1.0E99/

CH3O+O2=CH2O+HO2 4.38E-19 9.5 -5.501E3

REV/1.416E-20 9.816E0 2.108E4/

CH3O+CH3=CH2O+CH4 1.2E13 0.0 0.0E0

REV/6.749E13 2.18E-1 8.281E4/

CH3O+H=CH2O+H2 2.0E13 0.0 0.0E0

REV/1.233E11 6.64E-1 8.127E4/

CH3O+HO2=CH2O+H2O2 3.01E11 0.0 0.0E0

REV/1.074E12 -3.1E-2 6.527E4/

CH3+H(+M)=CH4(+M) 1.27E16 -0.6 3.83E2

H2/2.0/

H2O/6.0/

AR/0.7/

CO/1.5/

CO2/2.0/

CH4/2.0/

C2H6/3.0/

HE/0.7/

LOW/2.477E33 -4.76E0 2.444E3/

TROE/7.83E-1 7.4E1 2.94E3 6.96E3/

CH4+H=CH3+H2 6.14E5 2.5 9.587E3

REV/6.73E2 2.946E0 8.047E3/

CH4+OH=CH3+H2O 5.83E4 2.6 2.19E3

REV/6.776E2 2.94E0 1.554E4/

CH4+O=CH3+OH 1.02E9 1.5 8.6E3

REV/5.804E5 1.927E0 5.648E3/

CH4+HO2=CH3+H2O2 1.13E1 3.74 2.101E4

REV/7.166E0 3.491E0 3.468E3/

CH4+CH2=2CH3 2.46E6 2.0 8.27E3

REV/1.736E6 1.868E0 1.298E4/

CH3+OH=CH2O+H2 8.0E9 0.5 -1.755E3

REV/1.066E12 3.22E-1 6.821E4/

CH3+OH=CH2(S)+H2O 4.508E17 -1.34 1.417E3

REV/1.654E16 -8.55E-1 1.039E3/

CH3+OH=CH3O+H 6.943E7 1.343 1.12E4

REV/1.5E12 5.0E-1 -1.1E2/

CH3+OH=CH2+H2O 5.6E7 1.6 5.42E3

REV/9.224E5 2.072E0 1.406E4/

CH3+HO2=CH3O+OH 1.0E12 0.269 -6.875E2

REV/6.19E12 1.47E-1 2.455E4/

CH3+HO2=CH4+O2 1.16E5 2.23 -3.022E3

REV/2.018E7 2.132E0 5.321E4/

CH3+O=CH2O+H 5.54E13 0.05 -1.36E2

REV/3.83E15 -1.47E-1 6.841E4/

CH3+O2=CH3O+O 7.546E12 0.0 2.832E4

REV/4.718E14 -4.51E-1 2.88E2/

CH3+O2=CH2O+OH 2.641E0 3.283 8.105E3

REV/5.285E-1 3.477E0 5.992E4/

CH3+O2(+M)=CH3O2(+M) 7.812E9 0.9 0.0E0

LOW/6.85E24 -3.0E0 0.0E0/

TROE/6.0E-1 1.0E3 7.0E1 1.7E3/

CH3O2+CH2O=CH3O2H+HCO 1.99E12 0.0 1.166E4

REV/1.323E14 -8.53E-1 9.259E3/

CH4+CH3O2=CH3+CH3O2H 1.81E11 0.0 1.848E4

REV/2.233E12 -6.94E-1 -6.55E2/

CH3O2+CH3=2CH3O 5.08E12 0.0 -1.411E3

REV/1.967E12 1.76E-1 2.807E4/

CH3O2+HO2=CH3O2H+O2 2.47E11 0.0 -1.57E3

REV/5.302E14 -7.92E-1 3.552E4/

2CH3O2=>O2+2CH3O 1.4E16 -1.61 1.86E3

CH3O2+H=CH3O+OH 9.6E13 0.0 0.0E0

REV/1.72E9 1.019E0 4.078E4/

CH3O2+O=CH3O+O2 3.6E13 0.0 0.0E0

REV/2.229E11 6.28E-1 5.752E4/

CH3O2H=CH3O+OH 6.31E14 0.0 4.23E4

REV/2.514E6 1.883E0 -2.875E3/

CH2(S)=CH2 1.0E13 0.0 0.0E0

REV/4.488E12 -1.3E-2 9.02E3/

CH2(S)+CH4=2CH3 1.6E13 0.0 -5.7E2

REV/5.067E12 -1.45E-1 1.316E4/

CH2(S)+O2=>CO+OH+H 7.0E13 0.0 0.0E0

CH2(S)+H2=CH3+H 7.0E13 0.0 0.0E0

REV/2.022E16 -5.91E-1 1.527E4/

CH2(S)+H=CH2+H 3.0E13 0.0 0.0E0

REV/1.346E13 -1.3E-2 9.02E3/

CH2(S)+O=>CO+2H 3.0E13 0.0 0.0E0

CH2(S)+OH=CH2O+H 3.0E13 0.0 0.0E0

REV/1.154E18 -7.7E-1 8.523E4/

CH2(S)+CO2=CH2O+CO 3.0E12 0.0 0.0E0

REV/4.366E10 4.21E-1 5.981E4/

CH2+H(+M)=CH3(+M) 2.5E16 -0.8 0.0E0

H2/2.0/

H2O/6.0/

AR/0.7/

CO/1.5/

CO2/2.0/

CH4/2.0/

C2H6/3.0/

HE/0.7/

LOW/3.2E27 -3.14E0 1.23E3/

TROE/6.8E-1 7.8E1 1.995E3 5.59E3/

CH2+O2=CH2O+O 2.4E12 0.0 1.5E3

REV/5.955E14 -3.65E-1 6.098E4/

CH2+O2=>CO2+2H 5.8E12 0.0 1.5E3

CH2+O2=>CO+OH+H 5.0E12 0.0 1.5E3

CH2+O=>CO+2H 5.0E13 0.0 0.0E0

2CH3(+M)=C2H6(+M) 9.214E16 -1.17 6.358E2

H2/2.0/

H2O/6.0/

AR/0.7/

CO/1.5/

CO2/2.0/

CH4/2.0/

C2H6/3.0/

HE/0.7/

LOW/1.135E36 -5.246E0 1.705E3/

TROE/4.05E-1 1.12E3 6.96E1 1.0E10/

C2H5+H(+M)=C2H6(+M) 5.21E17 -0.99 1.58E3

H2/2.0/

H2O/6.0/

AR/0.7/

CO/1.5/

CO2/2.0/

CH4/2.0/

C2H6/3.0/

HE/0.7/

LOW/1.99E41 -7.08E0 6.685E3/

TROE/8.42E-1 1.25E2 2.219E3 6.882E3/

C2H6+H=C2H5+H2 1.15E8 1.9 7.53E3

REV/1.062E4 2.582E0 9.76E3/

C2H6+O=C2H5+OH 3.55E6 2.4 5.83E3

REV/1.702E2 3.063E0 6.648E3/

C2H6+OH=C2H5+H2O 1.48E7 1.9 9.5E2

REV/1.45E4 2.476E0 1.807E4/

C2H6+O2=C2H5+HO2 6.03E13 0.0 5.187E4

REV/2.921E10 3.34E-1 -5.93E2/

C2H6+CH3=C2H5+CH4 1.51E-7 6.0 6.047E3

REV/1.273E-8 6.236E0 9.817E3/

C2H6+HO2=C2H5+H2O2 3.46E1 3.61 1.692E4

REV/1.849E0 3.597E0 3.151E3/

C2H6+CH3O2=C2H5+CH3O2H 1.94E1 3.64 1.71E4

REV/2.017E1 3.182E0 1.734E3/

CH2(S)+C2H6=CH3+C2H5 1.2E14 0.0 0.0E0

REV/3.203E12 9.1E-2 1.75E4/

C2H4+H(+M)=C2H5(+M) 1.081E12 0.454 1.822E3

H2/2.0/

H2O/6.0/

AR/0.7/

CO/1.5/

CO2/2.0/

CH4/2.0/

C2H6/3.0/

HE/0.7/

LOW/1.2E42 -7.62E0 6.97E3/

TROE/9.75E-1 2.1E2 9.84E2 4.374E3/

H2+CH3O2=H+CH3O2H 1.5E14 0.0 2.603E4

REV/1.688E18 -1.14E0 8.434E3/

C2H5+C2H3=2C2H4 6.859E11 0.11 -4.3E3

REV/4.82E14 0.0E0 7.153E4/

CH3+C2H5=CH4+C2H4 1.18E4 2.45 -2.921E3

REV/2.39E6 2.4E0 6.669E4/

C2H5+H=2CH3 9.69E13 0.0 2.2E2

REV/2.029E9 1.028E0 1.051E4/

C2H5+H=C2H4+H2 2.0E12 0.0 0.0E0

REV/4.44E11 3.96E-1 6.807E4/

C2H5+O=CH3CHO+H 1.1E14 0.0 0.0E0

REV/1.033E17 -5.0E-1 7.742E4/

C2H5O2=C2H5+O2 1.312E62 -14.784 4.918E4

REV/2.876E56 -1.382E1 1.462E4/

C2H5+O2=C2H4+HO2 7.561E14 -1.01 4.749E3

REV/8.802E14 -9.62E-1 1.813E4/

DUP

C2H5+O2=C2H4+HO2 4.0E-1 3.88 1.362E4

REV/4.656E-1 3.928E0 2.7E4/

DUP

C2H5+O2=C2H4O1-2+OH 1.626E11 -0.31 6.15E3

REV/3.633E13 -6.26E-1 3.984E4/

C2H5+O2=CH3CHO+OH 8.265E2 2.41 5.285E3

REV/2.247E3 2.301E0 6.597E4/

C2H5O2=CH3CHO+OH 2.52E41 -10.2 4.371E4

REV/1.502E36 -9.345E0 6.984E4/

C2H5O2=C2H4+HO2 1.815E38 -8.45 3.789E4

REV/4.632E32 -7.438E0 1.67E4/

C2H5O2=C2H4O1-2+OH 4.0E43 -10.46 4.558E4

REV/1.959E40 -9.812E0 4.471E4/

C2H4O1-2=CH3+HCO 3.63E13 0.0 5.72E4

REV/1.006E4 1.549E0 -2.75E3/

C2H4O1-2=CH3CHO 7.407E12 0.0 5.38E4

REV/9.013E10 2.07E-1 8.08E4/

C2H4O1-2+OH=C2H3O1-2+H2O 1.78E13 0.0 3.61E3

REV/1.347E10 6.93E-1 2.474E4/

C2H4O1-2+H=C2H3O1-2+H2 8.0E13 0.0 9.68E3

REV/5.71E9 7.99E-1 1.592E4/

C2H4O1-2+HO2=C2H3O1-2+H2O2 1.13E13 0.0 3.043E4

REV/4.666E11 1.04E-1 2.067E4/

C2H4O1-2+CH3O2=C2H3O1-2+CH3O2H 1.13E13 0.0 3.043E4

REV/9.078E12 -3.41E-1 1.907E4/

C2H4O1-2+CH3=C2H3O1-2+CH4 1.07E12 0.0 1.183E4

REV/6.967E10 3.53E-1 1.961E4/

C2H3O1-2=CH3CO 8.5E14 0.0 1.4E4

REV/1.002E14 4.1E-2 4.871E4/

C2H3O1-2=CH2CHO 1.0E14 0.0 1.4E4

REV/1.245E15 -3.75E-1 4.401E4/

CH3CHO=CH3+HCO 7.687E20 -1.342 8.695E4

REV/1.75E13 0.0E0 0.0E0/

CH3CHO+H=CH3CO+H2 2.37E13 0.0 3.642E3

REV/1.639E10 6.33E-1 1.76E4/

CH3CHO+O=CH3CO+OH 5.94E12 0.0 1.868E3

REV/2.133E9 6.14E-1 1.441E4/

CH3CHO+OH=CH3CO+H2O 3.37E12 0.0 -6.19E2

REV/2.472E10 5.27E-1 2.823E4/

CH3CHO+O2=CH3CO+HO2 3.01E13 0.0 3.915E4

REV/1.092E11 2.85E-1 -1.588E3/

CH3CHO+CH3=CH3CO+CH4 7.08E-4 4.58 1.966E3

REV/4.468E-4 4.767E0 1.746E4/

CH3CHO+HO2=CH3CO+H2O2 3.01E12 0.0 1.192E4

REV/1.205E12 -6.2E-2 9.877E3/

CH3O2+CH3CHO=CH3O2H+CH3CO 3.01E12 0.0 1.192E4

REV/2.344E13 -5.07E-1 8.282E3/

CH3CHO+CH3CO3=CH3CO+CH3CO3H 3.01E12 0.0 1.192E4

REV/1.922E12 -1.0E-2 1.265E4/

CH3CHO+OH=CH3+HOCHO 3.0E15 -1.076 0.0E0

REV/2.371E16 -1.277E0 2.375E4/

CH3CHO+OH=CH2CHO+H2O 1.72E5 2.4 8.15E2

REV/1.332E5 2.511E0 2.495E4/

CH3CO(+M)=CH3+CO(+M) 3.0E12 0.0 1.672E4

LOW/1.2E15 0.0E0 1.2518E4/

CH3CO+H=CH2CO+H2 2.0E13 0.0 0.0E0

REV/1.037E13 2.01E-1 6.056E4/

CH3CO+O=CH2CO+OH 2.0E13 0.0 0.0E0

REV/5.381E12 1.82E-1 5.914E4/

CH3CO+CH3=CH2CO+CH4 5.0E13 0.0 0.0E0

REV/2.364E16 -2.45E-1 6.21E4/

CH3CO3=CH3CO+O2 6.863E19 -1.949 3.853E4

REV/1.2E11 0.0E0 -1.1E3/

CH3CO3+HO2=CH3CO3H+O2 1.75E10 0.0 -3.275E3

REV/3.08E12 -2.94E-1 3.818E4/

H2O2+CH3CO3=HO2+CH3CO3H 2.41E12 0.0 9.936E3

REV/3.845E12 5.3E-2 1.271E4/

CH4+CH3CO3=CH3+CH3CO3H 1.81E11 0.0 1.848E4

REV/1.831E11 -1.96E-1 3.711E3/

CH2O+CH3CO3=HCO+CH3CO3H 1.99E12 0.0 1.166E4

REV/1.085E13 -3.56E-1 1.362E4/

C2H6+CH3CO3=C2H5+CH3CO3H 1.7E13 0.0 2.046E4

REV/1.45E12 4.0E-2 9.46E3/

CH3CO3H=CH3CO2+OH 5.01E14 0.0 4.015E4

REV/3.618E7 1.761E0 1.338E3/

CH3CO2+M=CH3+CO2+M 4.4E15 0.0 1.05E4

REV/4.548E8 1.378E0 1.752E4/

CH2CHO=CH2CO+H 4.071E15 -0.342 5.06E4

REV/5.0E13 0.0E0 1.23E4/

CH2CHO+O2=>CH2O+CO+OH 8.95E13 -0.6 1.012E4

!Troe Fall-off reaction

CH2+CO(+M)=CH2CO(+M) 8.1E11 0.0 0.0E0

H2/2.0/

H2O/6.0/

AR/0.7/

CO/1.5/

CO2/2.0/

CH4/2.0/

C2H6/3.0/

HE/0.7/

LOW/2.69E33 -5.11E0 7.095E3/

TROE/5.907E-1 2.75E2 1.226E3 5.185E3/

CH2CO+H=CH3+CO 1.1E13 0.0 3.4E3

REV/2.4E12 0.0E0 4.02E4/

CH2CO+H=HCCO+H2 2.0E14 0.0 8.0E3

REV/1.434E11 4.7E-1 4.52E3/

CH2CO+O=CH2+CO2 1.75E12 0.0 1.35E3

REV/2.854E9 8.09E-1 4.944E4/

CH2CO+O=HCCO+OH 1.0E13 0.0 8.0E3

REV/3.723E9 4.52E-1 3.108E3/

CH2CO+OH=HCCO+H2O 1.0E13 0.0 2.0E3

REV/7.604E10 3.65E-1 1.341E4/

CH2(S)+CH2CO=C2H4+CO 1.6E14 0.0 0.0E0

REV/3.75E14 2.17E-1 1.034E5/

HCCO+OH=>H2+2CO 1.0E14 0.0 0.0E0

H+HCCO=CH2(S)+CO 1.1E13 0.0 0.0E0

REV/4.061E7 1.561E0 1.854E4/

HCCO+O=>H+2CO 8.0E13 0.0 0.0E0

HCCO+O2=>OH+2CO 4.2E10 0.0 8.5E2

C2H3+H(+M)=C2H4(+M) 1.36E14 0.173 6.6E2

H2/2.0/

H2O/6.0/

AR/0.7/

CO/1.5/

CO2/2.0/

CH4/2.0/

C2H6/3.0/

HE/0.7/

LOW/1.4E30 -3.86E0 3.32E3/

TROE/7.82E-1 2.075E2 2.663E3 6.095E3/

C2H4(+M)=C2H2+H2(+M) 8.0E12 0.44 8.877E4

H2/2.0/

H2O/6.0/

AR/0.7/

CO/1.5/

CO2/2.0/

CH4/2.0/

C2H6/3.0/

HE/0.7/

LOW/1.58E51 -9.3E0 9.78E4/

TROE/7.35E-1 1.8E2 1.035E3 5.417E3/

C2H4+H=C2H3+H2 5.07E7 1.93 1.295E4

REV/1.602E4 2.436E0 5.19E3/

C2H4+O=CH3+HCO 8.564E6 1.88 1.83E2

REV/3.297E2 2.602E0 2.614E4/

C2H4+O=CH2CHO+H 4.986E6 1.88 1.83E2

REV/1.541E9 1.201E0 1.878E4/

C2H4+OH=C2H3+H2O 1.8E6 2.0 2.5E3

REV/6.029E3 2.4E0 9.632E3/

C2H4+CH3=C2H3+CH4 6.62E0 3.7 9.5E3

REV/1.908E0 3.76E0 3.28E3/

C2H4+O2=C2H3+HO2 4.0E13 0.0 5.82E4

REV/6.626E10 1.58E-1 -4.249E3/

C2H4+CH3O2=C2H3+CH3O2H 2.23E12 0.0 1.719E4

REV/7.929E12 -6.34E-1 -8.167E3/

C2H4+CH3CO3=C2H3+CH3CO3H 1.13E13 0.0 3.043E4

REV/3.295E12 -1.36E-1 9.44E3/

C2H4+CH3O2=C2H4O1-2+CH3O 2.82E12 0.0 1.711E4

REV/3.385E13 -6.5E-2 4.166E4/

C2H4+HO2=C2H4O1-2+OH 2.23E12 0.0 1.719E4

REV/4.28E14 -3.64E-1 3.75E4/

CH2(S)+CH3=C2H4+H 2.0E13 0.0 0.0E0

REV/6.128E19 -1.223E0 7.305E4/

C2H2+H(+M)=C2H3(+M) 5.6E12 0.0 2.4E3

H2/2.0/

H2O/6.0/

AR/0.7/

CO/1.5/

CO2/2.0/

CH4/2.0/

C2H6/3.0/

HE/0.7/

LOW/3.8E40 -7.27E0 7.22E3/

TROE/7.51E-1 9.85E1 1.302E3 4.167E3/

C2H3+O2=C2H2+HO2 2.12E-6 6.0 9.484E3

REV/1.087E-5 5.905E0 2.403E4/

C2H3+O2=CH2O+HCO 8.5E28 -5.312 6.5E3

REV/3.994E27 -4.883E0 9.345E4/

C2H3+O2=CH2CHO+O 5.5E14 -0.611 5.26E3

REV/3.0E18 -1.386E0 1.63E4/

CH3+C2H3=CH4+C2H2 3.92E11 0.0 0.0E0

REV/3.497E14 -1.93E-1 7.078E4/

C2H3+H=C2H2+H2 9.64E13 0.0 0.0E0

REV/9.427E13 2.53E-1 6.924E4/

C2H3+OH=C2H2+H2O 5.0E12 0.0 0.0E0

REV/5.184E13 1.47E-1 8.413E4/

C2H2+O2=HCCO+OH 2.0E8 1.5 3.01E4

REV/2.039E6 1.541E0 3.227E4/

C2H2+O=CH2+CO 6.94E6 2.0 1.9E3

REV/4.05E1 3.198E0 4.836E4/

C2H2+O=HCCO+H 1.35E7 2.0 1.9E3

REV/4.755E7 1.65E0 2.08E4/

C2H2+OH=CH2CO+H 3.236E13 0.0 1.2E4

REV/3.061E17 -8.02E-1 3.579E4/

C2H2+OH=CH3+CO 4.83E-4 4.0 -2.0E3

REV/3.495E-6 4.638E0 5.212E4/

CH3COCH2=CH2CO+CH3 1.0E14 0.0 3.1E4

REV/1.0E11 0.0E0 6.0E3/

C2H3CHO=C2H3+HCO 2.003E24 -2.135 1.034E5

REV/1.81E13 0.0E0 0.0E0/

C2H3CHO+H=C2H3CO+H2 1.34E13 0.0 3.3E3

REV/3.311E10 6.13E-1 2.268E4/

C2H3CHO+O=C2H3CO+OH 5.94E12 0.0 1.868E3

REV/7.618E9 5.94E-1 1.984E4/

C2H3CHO+OH=C2H3CO+H2O 9.24E6 1.5 -9.62E2

REV/2.42E5 2.007E0 3.331E4/

C2H3CHO+O2=C2H3CO+HO2 1.005E13 0.0 4.07E4

REV/1.302E11 2.65E-1 5.391E3/

C2H3CHO+HO2=C2H3CO+H2O2 3.01E12 0.0 1.192E4

REV/4.303E12 -8.2E-2 1.53E4/

C2H3CHO+CH3=C2H3CO+CH4 2.608E6 1.78 5.911E3

REV/5.878E6 1.947E0 2.683E4/

C2H3CHO+C2H3=C2H3CO+C2H4 1.74E12 0.0 8.44E3

REV/1.0E13 0.0E0 2.8E4/

C2H3CHO+CH3O2=C2H3CO+CH3O2H 3.01E12 0.0 1.192E4

REV/8.371E13 -5.27E-1 1.371E4/

C2H3CO=C2H3+CO 1.37E21 -2.179 3.941E4

REV/1.51E11 0.0E0 4.81E3/

C2H5CHO=C2H5+HCO 1.496E27 -3.205 8.704E4

REV/1.81E13 0.0E0 0.0E0/

C2H5CHO+H=C2H5CO+H2 4.0E13 0.0 4.2E3

REV/2.377E10 6.54E-1 1.813E4/

C2H5CHO+O=C2H5CO+OH 5.0E12 0.0 1.79E3

REV/1.542E9 6.36E-1 1.431E4/

C2H5CHO+OH=C2H5CO+H2O 2.69E10 0.76 -3.4E2

REV/1.695E8 1.308E0 2.848E4/

C2H5CHO+CH3=C2H5CO+CH4 2.608E6 1.78 5.911E3

REV/1.414E6 1.988E0 2.138E4/

C2H5CHO+HO2=C2H5CO+H2O2 2.8E12 0.0 1.36E4

REV/9.626E11 -4.1E-2 1.153E4/

C2H5CHO+CH3O2=C2H5CO+CH3O2H 3.01E12 0.0 1.192E4

REV/2.013E13 -4.85E-1 8.26E3/

C2H5CHO+C2H5=C2H5CO+C2H6 1.0E12 0.0 8.0E3

REV/6.432E12 -2.8E-2 1.97E4/

C2H5CHO+O2=C2H5CO+HO2 1.005E13 0.0 4.07E4

REV/3.131E10 3.06E-1 -5.8E1/

C2H5CHO+CH3CO3=C2H5CO+CH3CO3H 3.01E12 0.0 1.192E4

REV/1.651E12 1.2E-2 1.263E4/

C2H5CHO+C2H3=C2H5CO+C2H4 1.7E12 0.0 8.44E3

REV/3.198E12 1.48E-1 3.013E4/

C2H5CO=C2H5+CO 2.46E23 -3.208 1.755E4

REV/1.51E11 0.0E0 4.81E3/

NC3H7=CH3+C2H4 9.97E40 -8.6 4.143E4

REV/1.898E34 -6.99E0 1.71E4/

NC3H7=H+C3H6 8.78E39 -8.1 4.658E4

REV/2.07E37 -7.39E0 1.202E4/

NC3H7+O2=C3H6+HO2 3.0E-19 0.0 3.0E3

REV/2.0E-19 0.0E0 1.75E4/

C2H5CHO+C3H5-A=C2H5CO+C3H6 1.7E12 0.0 8.44E3

REV/1.0E13 0.0E0 2.8E4/

C3H6=C2H3+CH3 2.73E62 -13.28 1.232E5

REV/6.822E53 -1.1779E1 2.055E4/

C3H6=C3H5-A+H 2.01E61 -13.26 1.185E5

REV/2.041E61 -1.352E1 3.061E4/

C3H6=C3H5-S+H 7.71E69 -16.09 1.4E5

REV/2.551E67 -1.5867E1 2.869E4/

C3H6=C3H5-T+H 5.62E71 -16.58 1.393E5

REV/4.26E68 -1.6164E1 3.008E4/

C3H6+O=C2H5+HCO 1.58E7 1.76 -1.216E3

REV/9.188E1 2.725E0 2.311E4/

C3H6+O=>CH2CO+CH3+H 2.5E7 1.76 7.6E1

C3H6+O=>CH3CHCO+2H 2.5E7 1.76 7.6E1

C3H6+O=C3H5-A+OH 5.24E11 0.7 5.884E3

REV/1.104E11 6.97E-1 2.015E4/

C3H6+O=C3H5-S+OH 1.2E11 0.7 8.959E3

REV/8.239E7 1.18E0 -2.07E2/

C3H6+O=C3H5-T+OH 6.03E10 0.7 7.632E3

REV/9.483E6 1.373E0 5.76E2/

C3H6+OH=C3H5-A+H2O 3.12E6 2.0 -2.98E2

REV/1.343E7 1.909E0 3.027E4/

C3H6+OH=C3H5-S+H2O 2.11E6 2.0 2.778E3

REV/2.959E4 2.393E0 9.916E3/

C3H6+OH=C3H5-T+H2O 1.11E6 2.0 1.451E3

REV/3.565E3 2.586E0 1.07E4/

C3H6+HO2=C3H5-A+H2O2 2.7E4 2.5 1.234E4

REV/6.341E6 1.82E0 1.201E4/

C3H6+HO2=C3H5-S+H2O2 1.8E4 2.5 2.762E4

REV/1.377E4 2.304E0 3.864E3/

C3H6+HO2=C3H5-T+H2O2 9.0E3 2.5 2.359E4

REV/1.577E3 2.497E0 1.941E3/

C3H6+H=C3H5-A+H2 1.73E5 2.5 2.492E3

REV/7.023E4 2.515E0 1.817E4/

C3H6+H=C3H5-S+H2 8.04E5 2.5 1.228E4

REV/1.063E3 2.999E0 4.526E3/

C3H6+H=C3H5-T+H2 4.05E5 2.5 9.794E3

REV/1.227E2 3.192E0 4.15E3/

C3H6+H=C2H4+CH3 2.3E13 0.0 2.547E3

REV/7.272E7 1.271E0 1.12E4/

C3H6+O2=C3H5-A+HO2 4.0E12 0.0 3.99E4

REV/8.514E12 -3.33E-1 8.87E2/

C3H6+O2=C3H5-S+HO2 2.0E12 0.0 6.29E4

REV/1.387E10 1.51E-1 4.59E2/

C3H6+O2=C3H5-T+HO2 1.4E12 0.0 6.07E4

REV/2.224E9 3.44E-1 3.69E2/

C3H6+CH3=C3H5-A+CH4 2.21E0 3.5 5.675E3

REV/8.184E2 3.07E0 2.289E4/

C3H6+CH3=C3H5-S+CH4 1.348E0 3.5 1.285E4

REV/1.626E0 3.553E0 6.635E3/

C3H6+CH3=C3H5-T+CH4 8.4E-1 3.5 1.166E4

REV/2.322E-1 3.746E0 7.552E3/

C3H6+C2H5=C3H5-A+C2H6 1.0E11 0.0 9.8E3

REV/5.369E5 1.33E0 1.644E4/

C3H6+CH3CO3=C3H5-A+CH3CO3H 3.24E11 0.0 1.49E4

REV/2.0E10 0.0E0 1.5E4/

C3H6+CH3O2=C3H5-A+CH3O2H 3.24E11 0.0 1.49E4

REV/2.0E10 0.0E0 1.5E4/

C3H5-A=C2H2+CH3 2.397E48 -9.9 8.208E4

REV/2.61E46 -9.82E0 3.695E4/

C3H5-A=C3H4-A+H 4.194E13 0.216 6.193E4

REV/2.4E11 6.9E-1 3.007E3/

C3H5-A+HO2=C3H5O+OH 7.0E12 0.0 -1.0E3

REV/1.605E12 6.0E-2 1.166E4/

C3H5-A+CH3O2=C3H5O+CH3O 7.0E12 0.0 -1.0E3

REV/1.99E15 -7.4E-1 1.702E4/

C3H5-A+H=C3H4-A+H2 1.232E3 3.035 2.582E3

REV/2.818E0 3.784E0 4.722E4/

C3H5-A+CH3=C3H4-A+CH4 1.0E11 0.0 0.0E0

REV/4.921E12 5.0E-2 4.778E4/

C3H5-A+C2H5=C2H6+C3H4-A 4.0E11 0.0 0.0E0

REV/1.802E12 5.0E-2 4.033E4/

C3H5-A+C2H5=C2H4+C3H6 4.0E11 0.0 0.0E0

REV/6.937E16 -1.33E0 5.28E4/

C3H5-A+C2H3=C2H4+C3H4-A 1.0E12 0.0 0.0E0

REV/1.624E13 5.0E-2 4.819E4/

C3H4-A+C3H6=2C3H5-A 4.749E8 0.734 2.87E4

REV/8.43E10 0.0E0 -2.62E2/

C3H5-A+O2=C3H4-A+HO2 2.18E21 -2.85 3.076E4

REV/2.614E19 -2.449E0 2.071E4/

C3H5-A+O2=CH2CHO+CH2O 7.14E15 -1.21 2.105E4

REV/4.944E16 -1.4E0 8.862E4/

C3H5-A+O2=C2H3CHO+OH 2.47E13 -0.44 2.302E4

REV/1.989E13 -6.09E-1 7.514E4/

C3H5-A+O2=>C2H2+CH2O+OH 9.72E29 -5.71 2.145E4

C3H5-S=C2H2+CH3 9.598E39 -8.17 4.203E4

REV/1.61E40 -8.58E0 2.033E4/

C3H5-S+O2=CH3CHO+HCO 4.335E12 0.0 0.0E0

REV/1.611E17 -1.27E0 9.653E4/

C3H5-S+H=C3H4-A+H2 3.333E12 0.0 0.0E0

REV/7.977E12 1.1E-1 6.886E4/

C3H5-S+CH3=C3H4-A+CH4 1.0E11 0.0 0.0E0

REV/6.253E12 1.1E-1 6.934E4/

C3H5-T=C2H2+CH3 2.163E40 -8.31 4.511E4

REV/1.61E40 -8.58E0 2.033E4/

C3H5-T=C3H4-A+H 3.508E14 -0.44 4.089E4

REV/8.5E12 0.0E0 2.0E3/

C3H5-T+O2=C3H4-A+HO2 1.89E30 -5.59 1.554E4

REV/3.037E31 -5.865E0 2.681E4/

C3H5-T+O2=CH3COCH2+O 3.81E17 -1.36 5.58E3

REV/2.0E11 0.0E0 1.75E4/

C3H5-T+O2=CH2O+CH3CO 3.71E25 -3.96 7.043E3

REV/1.872E27 -4.43E0 1.012E5/

C3H4-A+HO2=CH2CO+CH2+OH 4.0E12 0.0 1.9E4

REV/1.0E0 0.0E0 0.0E0/

C3H4-A+OH=CH2CO+CH3 3.12E12 0.0 -3.97E2

REV/1.806E17 -1.38E0 3.607E4/

C3H4-A+O=C2H4+CO 7.8E12 0.0 1.6E3

REV/3.269E8 1.252E0 1.219E5/

C3H4-A+O=C2H2+CH2O 3.0E-3 4.61 -4.243E3

REV/2.32E2 3.23E0 8.119E4/

C3H4-A+HO2=C2H4+CO+OH 1.0E12 0.0 1.4E4

REV/1.0E0 0.0E0 0.0E0/

C2H2+CH3=C3H4-A+H 6.74E19 -2.08 3.159E4

REV/6.407E25 -3.345E0 2.177E4/

CH3CHCO+OH=>C2H5+CO2 1.73E12 0.0 -1.01E3

CH3CHCO+H=>C2H5+CO 4.4E12 0.0 1.459E3

CH3CHCO+O=>CH3CHO+CO 3.2E12 0.0 -4.37E2

NC3H7O2=NC3H7+O2 2.4E20 -1.616 3.596E4

REV/4.52E12 0.0E0 0.0E0/

NC3H7O2=C3H6OOH1-2 6.0E11 0.0 2.685E4

REV/1.117E8 5.83E-1 1.172E4/

NC3H7O2=C3H6OOH1-3 1.125E11 0.0 2.44E4

REV/2.716E11 -5.07E-1 8.936E3/

C3H6OOH1-3=C3H6O1-3+OH 7.5E10 0.0 1.525E4

REV/1.186E6 1.765E0 2.871E4/

C3H6OOH1-2=C3H6+HO2 7.834E15 -1.3 1.595E4

REV/1.0E11 0.0E0 1.1E4/

C3H6OOH1-3=>OH+CH2O+C2H4 3.035E15 -0.79 2.74E4

C3H6OOH1-2=>C2H4+CH2O+OH 1.31E33 -7.01 4.812E4

C3H6OOH1-2O2=C3H6OOH1-2+O2 2.391E25 -2.945 4.01E4

REV/5.0E12 0.0E0 0.0E0/

C3H6OOH1-3O2=C3H6OOH1-3+O2 2.853E20 -1.626 3.569E4

REV/4.52E12 0.0E0 0.0E0/

C3H6OOH1-2O2=C3KET12+OH 6.0E11 0.0 2.64E4

REV/9.249E4 1.329E0 4.892E4/

C3H6OOH1-3O2=C3KET13+OH 7.5E10 0.0 2.14E4

REV/4.101E3 1.496E0 4.474E4/

C3KET12=>CH3CHO+HCO+OH 9.45E15 0.0 4.3E4

C3KET13=>CH2O+CH2CHO+OH 1.0E16 0.0 4.3E4

C3H5O=C2H3CHO+H 1.0E14 0.0 2.91E4

REV/1.676E14 -1.56E-1 1.969E4/

C3H5O=C2H3+CH2O 1.464E20 -1.968 3.509E4

REV/1.5E11 0.0E0 1.06E4/

C3H5O+O2=C2H3CHO+HO2 1.0E12 0.0 6.0E3

REV/1.288E11 0.0E0 3.2E4/

C3H6O1-3=C2H4+CH2O 6.0E14 0.0 6.0E4

REV/2.97E11 0.0E0 3.108E4/

C3H6O1-3+OH=>CH2O+C2H3+H2O 5.0E12 0.0 0.0E0

C3H6O1-3+O=>CH2O+C2H3+OH 8.43E13 0.0 5.2E3

C3H6O1-3+H=>CH2O+C2H3+H2 2.63E7 2.0 5.0E3

C3H6O1-3+CH3O2=>CH2O+C2H3+CH3O2H 1.0E13 0.0 1.9E4

C3H6O1-3+HO2=>CH2O+C2H3+H2O2 1.0E13 0.0 1.5E4

C3H6O1-3+CH3=>CH2O+C2H3+CH4 2.0E11 0.0 1.0E4

NC3H7O2=C3H6+HO2 5.044E38 -8.112 4.049E4

REV/1.198E30 -6.229E0 2.042E4/

PC4H9=C2H5+C2H4 3.504E12 0.463 2.947E4

REV/1.32E4 2.48E0 6.13E3/

PC4H9=C4H8-1+H 2.622E12 0.253 3.57E4

REV/2.5E11 5.1E-1 2.62E3/

PC4H9+O2=C4H8-1+HO2 2.0E-18 0.0 5.0E3

REV/2.0E-19 0.0E0 1.75E4/

C4H8-1=C3H5-A+CH3 5.081E19 -1.256 7.651E4

REV/1.35E13 0.0E0 0.0E0/

C4H8-1=C2H3+C2H5 2.882E23 -1.99 1.016E5

REV/9.0E12 0.0E0 0.0E0/

C4H8-1=H+C4H71-3 3.724E14 -0.111 8.52E4

REV/5.0E13 0.0E0 0.0E0/

C4H8-1+O2=C4H71-3+HO2 2.0E13 0.0 3.719E4

REV/4.653E12 7.0E-2 -1.68E2/

C4H8-1+H=C4H71-3+H2 3.376E5 2.36 2.07E2

REV/4.323E6 2.1E0 2.033E4/

C4H8-1+H=C4H71-4+H2 6.651E5 2.54 6.756E3

REV/3.045E4 2.54E0 1.103E4/

C4H8-1+OH=C4H71-3+H2O 2.764E4 2.64 -1.919E3

REV/1.532E6 2.38E0 3.336E4/

C4H8-1+OH=C4H71-4+H2O 5.27E9 0.97 1.586E3

REV/1.044E9 9.7E-1 2.101E4/

C4H8-1+CH3=C4H71-3+CH4 3.69E0 3.31 4.002E3

REV/1.234E3 3.05E0 2.461E4/

C4H8-1+CH3=C4H71-4+CH4 4.52E-1 3.65 7.154E3

REV/5.405E-1 3.65E0 1.191E4/

C4H8-1+HO2=C4H71-3+H2O2 4.82E3 2.55 1.053E4

REV/1.586E6 1.96E0 1.435E4/

C4H8-1+HO2=C4H71-4+H2O2 2.38E3 2.55 1.649E4

REV/2.8E3 2.22E0 4.46E3/

C4H8-1+CH3O2=C4H71-3+CH3O2H 4.82E3 2.55 1.053E4

REV/3.303E6 1.79E0 1.133E4/

C4H8-1+CH3O2=C4H71-4+CH3O2H 2.38E3 2.55 1.649E4

REV/5.831E3 2.04E0 1.44E3/

C4H8-1+CH3CO3=C4H71-3+CH3CO3H 1.0E11 0.0 8.0E3

REV/2.0E10 0.0E0 1.0E4/

C4H8-1+C3H5-A=C4H71-3+C3H6 7.9E10 0.0 1.24E4

REV/1.0E11 0.0E0 1.75E4/

C4H8-1+C4H6=2C4H71-3 2.35E12 0.0 4.672E4

REV/1.6E12 0.0E0 0.0E0/

C4H8-2=H+C4H71-3 2.337E14 0.143 8.789E4

REV/5.0E13 0.0E0 0.0E0/

C4H8-2+O2=C4H71-3+HO2 4.0E13 0.0 3.939E4

REV/1.35E13 -1.8E-1 -9.24E2/

C4H8-2+H=C4H71-3+H2 3.46E5 2.5 2.492E3

REV/6.428E6 1.99E0 1.966E4/

C4H8-2+OH=C4H71-3+H2O 6.24E6 2.0 -2.98E2

REV/5.019E8 1.49E0 3.202E4/

C4H8-2+CH3=C4H71-3+CH4 4.42E0 3.5 5.675E3

REV/2.145E3 2.99E0 2.332E4/

C4H8-2+HO2=C4H71-3+H2O2 1.928E4 2.6 1.391E4

REV/9.205E6 1.77E0 1.477E4/

C4H8-2+CH3O2=C4H71-3+CH3O2H 1.928E4 2.6 1.391E4

REV/1.917E7 1.59E0 1.175E4/

C4H71-4=C2H4+C2H3 8.766E12 -0.22 3.629E4

REV/2.0E11 0.0E0 7.8E3/

C4H71-3=C4H6+H 1.2E14 0.0 4.93E4

REV/4.0E13 0.0E0 1.3E3/

C4H71-3+C2H5=C4H8-1+C2H4 2.59E12 0.0 -1.31E2

REV/1.149E13 6.0E-2 4.944E4/

C4H71-3+CH3O=C4H8-1+CH2O 2.41E13 0.0 0.0E0

REV/2.482E12 2.8E-1 6.633E4/

C4H71-3+O=C2H3CHO+CH3 6.03E13 0.0 0.0E0

REV/3.385E15 -7.8E-1 8.163E4/

C3H5-A+C4H71-3=C3H6+C4H6 6.31E12 0.0 0.0E0

REV/1.0E10 0.0E0 5.0E4/

C4H71-3+O2=C4H6+HO2 1.0E9 0.0 0.0E0

REV/1.0E11 0.0E0 1.7E4/

H+C4H71-3=C4H6+H2 3.16E13 0.0 0.0E0

REV/1.066E13 0.0E0 5.681E4/

C2H5+C4H71-3=C4H6+C2H6 3.98E12 0.0 0.0E0

REV/3.211E12 0.0E0 4.984E4/

C2H3+C4H71-3=C2H4+C4H6 3.98E12 0.0 0.0E0

REV/1.157E13 0.0E0 5.771E4/

C4H6=2C2H3 4.027E19 -1.0 9.815E4

REV/1.26E13 0.0E0 0.0E0/

C4H6+OH=C2H5+CH2CO 1.0E12 0.0 0.0E0

REV/3.73E12 0.0E0 3.002E4/

C4H6+OH=CH2O+C3H5-A 1.0E12 0.0 0.0E0

REV/3.501E6 0.0E0 7.106E4/

C4H6+OH=C2H3+CH3CHO 1.0E12 0.0 0.0E0

REV/5.437E11 0.0E0 1.855E4/

C4H6+O=C2H4+CH2CO 1.0E12 0.0 0.0E0

REV/6.377E11 0.0E0 9.434E4/

C4H6+O=CH2O+C3H4-A 1.0E12 0.0 0.0E0

REV/1.075E12 0.0E0 7.905E4/

C2H3+C2H4=C4H6+H 5.0E11 0.0 7.3E3

REV/1.0E13 0.0E0 4.7E3/

PC4H9O2=PC4H9+O2 2.849E20 -1.642 3.593E4

REV/4.52E12 0.0E0 0.0E0/

PC4H9O2=C4H8OOH1-3 2.5E10 0.0 2.085E4

REV/3.231E9 -1.36E-1 7.871E3/

PC4H9O2=C4H8-1+HO2 5.044E38 -8.11 4.049E4

REV/1.599E30 -6.283E0 2.035E4/

C4H8OOH1-3=>OH+CH2O+C3H6 6.635E13 -0.16 2.99E4

CH2CH2COCH3=C2H4+CH3CO 1.0E14 0.0 1.8E4

REV/1.0E11 0.0E0 0.0E0/

C2H5COCH2=CH2CO+C2H5 1.0E14 0.0 3.5E4

REV/1.0E11 0.0E0 0.0E0/

CH3CHCOCH3=C2H3COCH3+H 3.417E16 -0.82 4.177E4

REV/5.0E12 0.0E0 1.2E3/

CH3CHCOCH3=CH3CHCO+CH3 1.406E15 -0.44 3.834E4

REV/1.23E11 0.0E0 7.8E3/

NC3H7CHO+O2=NC3H7CO+HO2 1.2E5 2.5 3.756E4

REV/1.0E7 5.0E-1 4.0E3/

NC3H7CHO+OH=NC3H7CO+H2O 2.0E6 1.8 -1.3E3

REV/1.553E4 2.32E0 2.805E4/

NC3H7CHO+H=NC3H7CO+H2 4.14E9 1.12 2.32E3

REV/3.03E6 1.746E0 1.678E4/

NC3H7CHO+O=NC3H7CO+OH 5.94E12 0.0 1.868E3

REV/2.258E9 6.07E-1 1.492E4/

NC3H7CHO+HO2=NC3H7CO+H2O2 4.09E4 2.5 1.02E4

REV/1.733E4 2.431E0 8.662E3/

NC3H7CHO+CH3=NC3H7CO+CH4 2.89E-3 4.62 3.21E3

REV/1.93E-3 4.8E0 1.921E4/

NC3H7CHO+CH3O2=NC3H7CO+CH3O2H 4.09E4 2.5 1.02E4

REV/3.371E5 1.986E0 7.067E3/

NC3H7CO=NC3H7+CO 1.0E11 0.0 9.6E3

REV/2.193E3 1.763E0 -1.1E3/

SC3H5CO=C3H5-S+CO 8.6E15 0.0 2.3E4

REV/1.0E11 0.0E0 6.0E3/

C2H3COCH3+OH=>CH3CHO+CH3CO 1.0E11 0.0 0.0E0

C2H3COCH3+OH=>CH2CO+C2H3+H2O 5.1E11 0.0 1.192E3

C2H3COCH3+HO2=>CH2CHO+CH3CO+OH 6.03E9 0.0 7.949E3

C2H3COCH3+HO2=>CH2CO+C2H3+H2O2 8.5E12 0.0 2.046E4

C2H3COCH3+CH3O2=>CH2CHO+CH3CO+CH3O 3.97E11 0.0 1.705E4

C2H3COCH3+CH3O2=>CH2CO+C2H3+CH3O2H 3.01E12 0.0 1.758E4

C5H11-1=C2H4+NC3H7 3.205E12 0.451 2.943E4

REV/8.8E3 2.48E0 6.13E3/

C5H11-1=H+C5H10-1 3.354E11 0.608 3.564E4

REV/2.5E11 5.1E-1 2.62E3/

C5H11-1=C5H11-2 3.875E9 0.353 1.976E4

REV/1.602E8 7.56E-1 2.22E4/

C5H11-2=C3H6+C2H5 1.223E12 0.635 2.936E4

REV/8.8E3 2.48E0 6.13E3/

C5H11-2=C5H10-1+H 2.353E10 1.011 3.668E4

REV/4.24E11 5.1E-1 1.23E3/

C5H10-1=C2H5+C3H5-A 9.864E21 -2.086 7.506E4

REV/4.0E12 0.0E0 -5.96E2/

C5H10-1+H=C5H91-3+H2 3.376E5 2.36 2.07E2

REV/3.096E5 2.53E0 2.032E4/

C5H10-1+O=C5H91-3+OH 6.6E5 2.43 1.21E3

REV/2.658E5 2.6E0 1.923E4/

C5H10-1+OH=C5H91-3+H2O 2.764E4 2.64 -1.919E3

REV/1.097E5 2.81E0 3.335E4/

C5H10-1+CH3=C5H91-3+CH4 3.69E0 3.31 4.002E3

REV/8.84E1 3.48E0 2.459E4/

C5H10-1+O2=C5H91-3+HO2 2.2E12 0.0 3.722E4

REV/3.665E10 4.9E-1 -1.52E2/

C5H10-1+HO2=C5H91-3+H2O2 4.82E3 2.55 1.053E4

REV/1.136E5 2.39E0 1.433E4/

C5H10-1+CH3O2=C5H91-3+CH3O2H 4.82E3 2.55 1.053E4

REV/2.366E5 2.21E0 1.131E4/

C5H91-3=C4H6+CH3 7.554E14 -0.52 3.852E4

REV/1.0E11 0.0E0 7.8E3/

C5H91-3=C5H81-3+H 4.733E11 0.636 4.264E4

REV/2.5E11 5.1E-1 2.62E3/

C5H81-3+OH=CH2O+C4H71-3 1.0E12 0.0 0.0E0

REV/1.0E11 0.0E0 1.5E4/

C5H81-3+OH=C2H3CHO+C2H5 1.0E12 0.0 0.0E0

REV/1.0E11 0.0E0 1.5E4/

C5H81-3+OH=CH3CHO+C3H5-S 1.0E12 0.0 0.0E0

REV/1.0E11 0.0E0 1.5E4/

C5H11-1+O2=C5H10-1+HO2 8.37E-1 3.59 1.196E4

REV/1.307E0 3.42E0 2.781E4/

C5H11-2+O2=C5H10-1+HO2 5.35E-1 3.71 9.322E3

REV/2.021E1 3.137E0 2.274E4/

C5H11O2-1=C5H11-1+O2 2.338E20 -1.62 3.583E4

REV/4.52E12 0.0E0 0.0E0/

C5H11O2-1=C5H10OOH1-4 3.125E9 0.0 1.905E4

REV/3.255E8 -1.06E-1 6.05E3/

C5H11O2-1=C5H10-1+HO2 5.044E38 -8.11 4.049E4

REV/1.523E31 -6.66E0 2.051E4/

C5H10OOH1-4=>C5H10O1-4+OH 9.375E9 0.0 6.0E3

C5H10O1-4+OH=>CH3COCH2+C2H4+H2O 2.5E12 0.0 0.0E0

C5H10O1-4+OH=>CH2CHO+C3H6+H2O 2.5E12 0.0 0.0E0

C5H10O1-4+HO2=>CH3COCH2+C2H4+H2O2 5.0E12 0.0 1.77E4

C5H10O1-4+HO2=>CH2CHO+C3H6+H2O2 5.0E12 0.0 1.77E4

C6H13-1+O2=C6H12-1+HO2 3.0E-19 0.0 3.0E3

REV/2.0E-19 0.0E0 1.75E4/

C6H13-2+O2=C6H12-1+HO2 4.5E-19 0.0 5.02E3

REV/2.0E-19 0.0E0 1.75E4/

C6H13-2+O2=C6H12-2+HO2 3.0E-19 0.0 3.0E3

REV/2.0E-19 0.0E0 1.75E4/

C6H13-1=C2H4+PC4H9 6.391E19 -1.97 3.064E4

REV/3.3E11 0.0E0 7.2E3/

C6H13-1=C6H12-1+H 9.621E13 -0.26 3.6E4

REV/1.0E13 0.0E0 2.9E3/

C6H13-2=C3H6+NC3H7 1.827E19 -1.8 3.017E4

REV/1.5E11 0.0E0 7.2E3/

C6H13-2=C6H12-1+H 6.248E12 0.09 3.682E4

REV/1.0E13 0.0E0 1.2E3/

C6H13-2=C6H12-2+H 1.271E13 -0.09 3.565E4

REV/1.0E13 0.0E0 2.9E3/

C6H13-1=C6H13-2 5.478E8 1.62 3.876E4

REV/3.558E7 1.97E0 4.127E4/

C6H12-1=NC3H7+C3H5-A 1.0E16 0.0 7.1E4

REV/1.0E13 0.0E0 0.0E0/

C6H12-2=C2H5+C4H71-3 1.0E16 0.0 7.1E4

REV/1.0E13 0.0E0 0.0E0/

C6H12-1+OH=>C5H11-1+CH2O 1.0E11 0.0 -4.0E3

C6H12-2+OH=>PC4H9+CH3CHO 1.0E11 0.0 -4.0E3

C6H12-1+O=>C5H11-1+HCO 1.0E11 0.0 -1.05E3

C6H12-2+O=>PC4H9+CH3CO 1.0E11 0.0 -1.05E3

C6H12-1+H=C6H111-3+H2 3.376E5 2.36 2.07E2

REV/4.378E6 2.1E0 2.033E4/

C6H12-1+OH=C6H111-3+H2O 2.764E4 2.64 -1.919E3

REV/1.552E6 2.38E0 3.336E4/

C6H12-1+CH3=C6H111-3+CH4 3.69E0 3.31 4.002E3

REV/1.25E3 3.05E0 2.46E4/

C6H12-1+HO2=C6H111-3+H2O2 9.64E3 2.55 1.053E4

C6H12-1+CH3O2=C6H111-3+CH3O2H 4.82E3 2.55 1.053E4

REV/3.345E6 1.79E0 1.132E4/

C6H12-2+H=C6H111-3+H2 1.73E5 2.5 2.492E3

REV/4.563E6 2.06E0 1.974E4/

C6H12-2+H=C6H112-4+H2 3.376E5 2.36 2.07E2

REV/4.384E6 2.1E0 2.033E4/

C6H12-2+H=C6H112-5+H2 1.3E6 2.4 4.471E3

REV/3.921E3 2.74E0 1.125E4/

C6H12-2+H=C6H112-6+H2 6.651E5 2.54 6.756E3

REV/3.122E4 2.53E0 1.103E4/

C6H12-2+OH=C6H111-3+H2O 3.12E6 2.0 -2.98E2

REV/3.563E8 1.56E0 3.211E4/

C6H12-2+OH=C6H112-4+H2O 2.764E4 2.64 -1.919E3

REV/1.554E6 2.38E0 3.336E4/

C6H12-2+OH=C6H112-5+H2O 4.67E5 1.61 -3.5E1

REV/6.099E3 1.95E0 2.19E4/

C6H12-2+OH=C6H112-6+H2O 5.27E9 0.97 1.586E3

REV/1.071E9 9.6E-1 2.101E4/

C6H12-2+CH3=C6H111-3+CH4 2.21E0 3.5 5.675E3

REV/1.523E3 3.06E0 2.341E4/

C6H12-2+CH3=C6H112-4+CH4 3.69E0 3.31 4.002E3

REV/1.252E3 3.05E0 2.46E4/

C6H12-2+CH3=C6H112-5+CH4 1.51E0 3.46 5.481E3

REV/1.19E-1 3.8E0 1.274E4/

C6H12-2+CH3=C6H112-6+CH4 4.521E-1 3.65 7.154E3

REV/5.543E-1 3.64E0 1.19E4/

C6H12-2+HO2=C6H111-3+H2O2 9.639E3 2.6 1.391E4

REV/6.534E6 1.84E0 1.485E4/

C6H12-2+HO2=C6H112-4+H2O2 4.82E3 2.55 1.053E4

REV/1.609E6 1.96E0 1.434E4/

C6H12-2+HO2=C6H112-5+H2O2 9.64E3 2.6 1.391E4

REV/7.473E2 2.61E0 4.382E3/

C6H12-2+HO2=C6H112-6+H2O2 2.38E4 2.55 1.649E4

REV/2.871E4 2.22E0 4.456E3/

C6H12-2+CH3O2=C6H111-3+CH3O2H 9.639E3 2.6 1.391E4

REV/1.361E7 1.66E0 1.183E4/

C6H12-2+CH3O2=C6H112-4+CH3O2H 4.82E3 2.55 1.053E4

REV/3.35E6 1.79E0 1.132E4/

C6H12-2+CH3O2=C6H112-5+CH3O2H 9.64E3 2.6 1.391E4

REV/1.556E3 2.44E0 1.362E3/

C6H12-2+CH3O2=C6H112-6+CH3O2H 2.38E4 2.55 1.649E4

REV/5.978E4 2.04E0 1.436E3/

C6H13O2-1=C6H13-1+O2 5.15E20 -1.71 3.579E4

REV/4.52E12 0.0E0 0.0E0/

C6H13O2-1=C6H12-1+HO2 5.044E38 -8.11 4.049E4

REV/9.638E29 -6.22E0 2.047E4/

NC4H9CHO+O2=NC4H9CO+HO2 2.0E13 0.5 4.22E4

REV/1.0E7 0.0E0 4.0E4/

NC4H9CHO+OH=NC4H9CO+H2O 2.69E10 0.76 -3.4E2

REV/2.143E10 7.3E-1 3.124E4/

NC4H9CHO+H=NC4H9CO+H2 4.0E13 0.0 4.2E3

REV/1.8E13 0.0E0 2.4E4/

NC4H9CHO+O=NC4H9CO+OH 5.0E12 0.0 1.79E3

REV/1.0E12 0.0E0 1.9E4/

NC4H9CHO+HO2=NC4H9CO+H2O2 2.8E12 0.0 1.36E4

REV/1.0E12 0.0E0 1.0E4/

NC4H9CHO+CH3=NC4H9CO+CH4 1.7E12 0.0 8.44E3

REV/1.5E13 0.0E0 2.8E4/

NC4H9CHO+CH3O2=NC4H9CO+CH3O2H 1.0E12 0.0 9.5E3

REV/2.5E10 0.0E0 1.0E4/

NC4H9CO=PC4H9+CO 1.0E11 0.0 9.6E3

REV/1.0E11 0.0E0 0.0E0/

NC3H7COCH2=NC3H7+CH2CO 1.226E18 -1.4 4.345E4

REV/1.0E11 0.0E0 1.16E4/

NC7H16=H+C7H15-1 2.68E88 -21.17 1.428E5

REV/7.264E84 -2.081E1 4.156E4/

NC7H16=H+C7H15-2 1.3E88 -21.01 1.395E5

REV/2.263E83 -2.031E1 4.083E4/

NC7H16=H+C7H15-3 1.3E88 -21.01 1.395E5

REV/2.263E83 -2.031E1 4.083E4/

NC7H16=H+C7H15-4 6.5E87 -21.01 1.395E5

REV/2.255E83 -2.031E1 4.083E4/

!Troe Fall-off reaction

NC7H16(+M)=C6H13-1+CH3(+M) 4.325E24 -2.12 8.99E4

LOW/4.963E42 -7.78E0 4.28E4/

TROE/8.92E-1 1.0E10 2.228E0 1.798E9/

NC7H16(+M)=C5H11-1+C2H5(+M) 6.818E26 -2.7 8.891E4

LOW/3.753E48 -9.46E0 4.131E4/

TROE/9.0E-2 3.6556E0 1.0E10 9.33E9/

NC7H16(+M)=PC4H9+NC3H7(+M) 1.362E26 -2.53 8.876E4

LOW/6.509E48 -9.57E0 4.129E4/

TROE/9.11E-1 1.0E10 2.2382E1 5.0E9/

NC7H16+H=C7H15-1+H2 1.88E5 2.75 6.28E3

REV/2.037E1 3.38E0 8.618E3/

NC7H16+H=C7H15-2+H2 2.6E6 2.4 4.471E3

REV/1.807E1 3.38E0 9.318E3/

NC7H16+H=C7H15-3+H2 2.6E6 2.4 4.471E3

REV/1.807E1 3.38E0 9.318E3/

NC7H16+H=C7H15-4+H2 1.3E6 2.4 4.471E3

REV/1.8E1 3.38E0 9.318E3/

NC7H16+O=C7H15-1+OH 1.93E5 2.68 3.716E3

REV/1.085E1 3.29E0 4.642E3/

NC7H16+O=C7H15-2+OH 9.54E4 2.71 2.106E3

REV/3.481E-1 3.67E0 5.541E3/

NC7H16+O=C7H15-3+OH 9.54E4 2.71 2.106E3

REV/3.481E-1 3.67E0 5.541E3/

NC7H16+O=C7H15-4+OH 4.77E4 2.71 2.106E3

REV/3.468E-1 3.67E0 5.541E3/

NC7H16+OH=C7H15-1+H2O 2.57E7 1.8 9.54E2

REV/2.952E4 2.33E0 1.818E4/

NC7H16+OH=C7H15-2+H2O 4.9E6 2.0 -5.96E2

REV/3.624E2 2.87E0 1.914E4/

NC7H16+OH=C7H15-3+H2O 4.9E6 2.0 -5.96E2

REV/3.624E2 2.87E0 1.914E4/

NC7H16+OH=C7H15-4+H2O 2.45E6 2.0 -5.96E2

REV/3.61E2 2.87E0 1.914E4/

NC7H16+HO2=C7H15-1+H2O2 4.08E1 3.59 1.716E4

REV/2.557E0 3.53E0 3.498E3/

NC7H16+HO2=C7H15-2+H2O2 1.264E2 3.37 1.372E4

REV/4.982E-1 3.66E0 2.562E3/

NC7H16+HO2=C7H15-3+H2O2 1.264E2 3.37 1.372E4

REV/4.982E-1 3.66E0 2.562E3/

NC7H16+HO2=C7H15-4+H2O2 6.32E1 3.37 1.372E4

REV/4.952E-1 3.66E0 2.562E3/

NC7H16+CH3=C7H15-1+CH4 9.04E-1 3.65 7.154E3

REV/8.935E-2 3.84E0 1.103E4/

NC7H16+CH3=C7H15-2+CH4 5.41E4 2.26 7.287E3

REV/3.432E2 2.79E0 1.367E4/

NC7H16+CH3=C7H15-3+CH4 5.41E4 2.26 7.287E3

REV/3.432E2 2.79E0 1.367E4/

NC7H16+CH3=C7H15-4+CH4 2.705E4 2.26 7.287E3

REV/3.419E2 2.79E0 1.367E4/

NC7H16+O2=C7H15-1+HO2 4.2E13 0.0 5.28E4

REV/2.386E10 2.8E-1 4.53E2/

NC7H16+O2=C7H15-2+HO2 2.8E13 0.0 5.015E4

REV/1.0E9 6.3E-1 3.09E2/

NC7H16+O2=C7H15-3+HO2 2.8E13 0.0 5.015E4

REV/1.0E9 6.3E-1 3.09E2/

NC7H16+O2=C7H15-4+HO2 1.4E13 0.0 5.015E4

REV/9.941E8 6.3E-1 3.09E2/

NC7H16+C2H5=C7H15-1+C2H6 1.0E11 0.0 1.34E4

REV/3.2E11 0.0E0 1.23E4/

NC7H16+C2H5=C7H15-2+C2H6 1.0E11 0.0 1.04E4

REV/1.0E11 0.0E0 1.29E4/

NC7H16+C2H5=C7H15-3+C2H6 1.0E11 0.0 1.04E4

REV/1.0E11 0.0E0 1.29E4/

NC7H16+C2H5=C7H15-4+C2H6 5.0E10 0.0 1.04E4

REV/1.0E11 0.0E0 1.29E4/

NC7H16+C2H3=C7H15-1+C2H4 1.0E12 0.0 1.8E4

REV/2.57E12 0.0E0 2.54E4/

NC7H16+C2H3=C7H15-2+C2H4 8.0E11 0.0 1.68E4

REV/2.0E12 0.0E0 2.42E4/

NC7H16+C2H3=C7H15-3+C2H4 8.0E11 0.0 1.68E4

REV/2.0E12 0.0E0 2.42E4/

NC7H16+C2H3=C7H15-4+C2H4 4.0E11 0.0 1.68E4

REV/2.0E12 0.0E0 2.42E4/

NC7H16+CH3O2=C7H15-1+CH3O2H 1.386E0 3.97 1.828E4

REV/1.69E0 3.46E0 3.024E3/

NC7H16+CH3O2=C7H15-2+CH3O2H 2.037E1 3.58 1.481E4

REV/1.562E0 3.42E0 2.054E3/

NC7H16+CH3O2=C7H15-3+CH3O2H 2.037E1 3.58 1.481E4

REV/1.562E0 3.42E0 2.054E3/

NC7H16+CH3O2=C7H15-4+CH3O2H 1.019E1 3.58 1.481E4

REV/1.553E0 3.42E0 2.054E3/

NC7H16+O2CHO=C7H15-1+HO2CHO 1.68E13 0.0 2.044E4

REV/1.17E3 2.25E0 3.057E3/

NC7H16+O2CHO=C7H15-2+HO2CHO 1.12E13 0.0 1.769E4

REV/2.482E1 2.64E0 2.823E3/

NC7H16+O2CHO=C7H15-3+HO2CHO 1.12E13 0.0 1.769E4

REV/2.482E1 2.64E0 2.823E3/

NC7H16+O2CHO=C7H15-4+HO2CHO 5.6E12 0.0 1.769E4

REV/2.472E1 2.64E0 2.823E3/

NC7H16+C7H15-1=C7H15-2+NC7H16 1.0E11 0.0 1.04E4

REV/1.5E11 0.0E0 1.23E4/

NC7H16+C7H15-1=C7H15-3+NC7H16 1.0E11 0.0 1.04E4

REV/1.5E11 0.0E0 1.23E4/

NC7H16+C7H15-1=C7H15-4+NC7H16 5.0E10 0.0 1.04E4

REV/1.5E11 0.0E0 1.23E4/

NC7H16+C7H15-2=C7H15-3+NC7H16 1.0E11 0.0 1.04E4

REV/1.0E11 0.0E0 1.04E4/

NC7H16+C7H15-2=C7H15-4+NC7H16 5.0E10 0.0 1.04E4

REV/1.0E11 0.0E0 1.04E4/

NC7H16+C7H15-3=C7H15-4+NC7H16 5.0E10 0.0 1.04E4

REV/1.0E11 0.0E0 1.04E4/

C7H15-1=C5H11-1+C2H4 1.227E19 -1.91 3.14E4

REV/1.0E11 0.0E0 8.2E3/

C7H15-1=C7H14-1+H 9.648E13 -0.26 3.601E4

REV/1.0E13 0.0E0 2.9E3/

C7H15-2=PC4H9+C3H6 9.764E18 -1.79 3.136E4

REV/1.0E11 0.0E0 8.2E3/

C7H15-2=C7H14-1+H 6.067E12 0.09 3.681E4

REV/1.0E13 0.0E0 1.2E3/

C7H15-2=C7H14-2+H 1.229E13 -0.08 3.564E4

REV/1.0E13 0.0E0 2.9E3/

C7H15-3=C4H8-1+NC3H7 6.165E18 -1.71 3.096E4

REV/1.0E11 0.0E0 7.7E3/

C7H15-3=C6H12-1+CH3 2.698E17 -1.35 3.148E4

REV/1.75E11 0.0E0 7.2E3/

C7H15-3=C7H14-2+H 1.229E13 -0.08 3.564E4

REV/1.0E13 0.0E0 2.9E3/

C7H15-3=C7H14-3+H 9.152E12 -0.02 3.573E4

REV/1.0E13 0.0E0 2.9E3/

C7H15-4=C2H5+C5H10-1 1.143E18 -1.34 3.143E4

REV/1.0E11 0.0E0 8.2E3/

C7H15-4=C7H14-3+H 1.819E13 -0.02 3.573E4

REV/1.0E13 0.0E0 2.9E3/

C7H15-1+O2=C7H14-1+HO2 3.0E-9 0.0 3.0E3

REV/6.517E-10 1.8E-1 1.876E4/

C7H15-2+O2=C7H14-1+HO2 4.5E-9 0.0 5.02E3

REV/1.532E-8 -1.6E-1 1.827E4/

C7H15-2+O2=C7H14-2+HO2 3.0E-9 0.0 3.0E3

REV/5.04E-9 1.0E-2 1.912E4/

C7H15-3+O2=C7H14-2+HO2 3.0E-9 0.0 3.0E3

REV/5.04E-9 1.0E-2 1.912E4/

C7H15-3+O2=C7H14-3+HO2 3.0E-9 0.0 3.0E3

REV/6.769E-9 -5.0E-2 1.903E4/

C7H15-4+O2=C7H14-3+HO2 6.0E-9 0.0 3.0E3

REV/6.795E-9 -5.0E-2 1.903E4/

C7H15-1=C7H15-3 1.386E9 0.98 3.376E4

REV/8.716E7 1.33E0 3.627E4/

C7H15-1=C7H15-4 2.541E9 0.35 1.976E4

REV/3.176E8 7.0E-1 2.227E4/

C7H15-2=C7H15-3 9.587E8 1.39 3.97E4

REV/9.587E8 1.39E0 3.97E4/

C7H15-1=C7H15-2 5.478E8 1.62 3.876E4

REV/3.445E7 1.97E0 4.127E4/

C7H14-2+H=C7H132-4+H2 3.376E5 2.36 2.07E2

REV/4.4E6 2.1E0 2.059E4/

C7H14-2+OH=C7H132-4+H2O 2.764E4 2.64 -1.919E3

REV/1.56E6 2.38E0 3.362E4/

C7H14-2+CH3=C7H132-4+CH4 3.69E0 3.31 4.002E3

REV/1.256E3 3.05E0 2.486E4/

C7H14-2+HO2=C7H132-4+H2O2 4.82E3 2.55 1.053E4

REV/1.615E6 1.96E0 1.46E4/

C7H14-2+CH3O2=C7H132-4+CH3O2H 4.82E3 2.55 1.053E4

REV/3.362E6 1.79E0 1.158E4/

C7H14-3+H=C7H132-4+H2 3.376E5 2.36 2.07E2

REV/3.276E6 2.16E0 2.068E4/

C7H14-3+H=C7H133-5+H2 3.376E5 2.36 2.07E2

REV/4.38E6 2.1E0 2.056E4/

C7H14-3+OH=C7H132-4+H2O 2.764E4 2.64 -1.919E3

REV/1.161E6 2.44E0 3.371E4/

C7H14-3+OH=C7H133-5+H2O 2.764E4 2.64 -1.919E3

REV/1.552E6 2.38E0 3.359E4/

C7H14-3+CH3=C7H132-4+CH4 3.69E0 3.31 4.002E3

REV/9.355E2 3.11E0 2.495E4/

C7H14-3+CH3=C7H133-5+CH4 3.69E0 3.31 4.002E3

REV/1.251E3 3.05E0 2.483E4/

C7H14-3+HO2=C7H132-4+H2O2 4.82E3 2.55 1.053E4

REV/1.202E6 2.03E0 1.469E4/

C7H14-3+HO2=C7H133-5+H2O2 4.82E3 2.55 1.053E4

REV/1.607E6 1.96E0 1.457E4/

C7H14-3+CH3O2=C7H132-4+CH3O2H 4.82E3 2.55 1.053E4

REV/2.503E6 1.85E0 1.167E4/

C7H14-3+CH3O2=C7H133-5+CH3O2H 4.82E3 2.55 1.053E4

REV/3.346E6 1.79E0 1.155E4/

C7H132-4+HO2=C7H13O2-4+OH 9.64E12 0.0 0.0E0

REV/4.273E15 -1.02E0 1.543E4/

C7H132-4+CH3O2=C7H13O2-4+CH3O 9.64E12 0.0 0.0E0

REV/4.173E17 -1.59E0 2.019E4/

C7H13O2-4=NC3H7CHO+C3H5-S 1.012E22 -2.46 2.919E4

REV/1.0E11 0.0E0 9.6E3/

C7H14-1+OH=>CH2O+C6H13-1 1.0E11 0.0 -4.0E3

C7H14-1+OH=>CH3CHO+C5H11-1 1.0E11 0.0 -4.0E3

C7H14-2+OH=>CH3CHO+C5H11-1 1.0E11 0.0 -4.0E3

C7H14-2+OH=>C2H5CHO+PC4H9 1.0E11 0.0 -4.0E3

C7H14-3+OH=>C2H5CHO+PC4H9 1.0E11 0.0 -4.0E3

C7H14-1+O=>CH2CHO+C5H11-1 1.0E11 0.0 -1.05E3

C7H14-2+O=>CH3CHO+C5H10-1 1.0E11 0.0 -1.05E3

C7H14-3+O=>CH3CHO+C5H10-1 1.0E11 0.0 -1.05E3

C7H14-1=PC4H9+C3H5-A 3.17E21 -1.62 7.533E4

REV/1.0E13 0.0E0 0.0E0/

C7H14-2=C4H71-3+NC3H7 3.735E21 -1.74 7.571E4

REV/1.0E13 0.0E0 0.0E0/

C7H14-3=C5H91-3+C2H5 5.947E21 -1.85 7.579E4

REV/1.0E13 0.0E0 0.0E0/

C7H15O2-1=C7H15-1+O2 2.657E20 -1.67 3.54E4

REV/4.52E12 0.0E0 0.0E0/

C7H15O2-2=C7H15-2+O2 1.357E23 -2.36 3.767E4

REV/7.54E12 0.0E0 0.0E0/

C7H15O2-3=C7H15-3+O2 1.357E23 -2.36 3.767E4

REV/7.54E12 0.0E0 0.0E0/

C7H15O2-4=C7H15-4+O2 1.357E23 -2.36 3.767E4

REV/7.54E12 0.0E0 0.0E0/

C7H15-3+C7H15O2-3=2C7H15O-3 7.0E12 0.0 -1.0E3

REV/5.51E15 -7.3E-1 3.179E4/

C7H15-3+HO2=C7H15O-3+OH 7.0E12 0.0 -1.0E3

REV/3.081E17 -1.15E0 2.807E4/

C7H15-3+CH3O2=C7H15O-3+CH3O 7.0E12 0.0 -1.0E3

REV/1.927E16 -8.5E-1 3.231E4/

C7H15O2-1=C7H14-1+HO2 1.0044E39 -8.11 4.149E4

C7H15O2-2=C7H14-1+HO2 1.0075E43 -9.41 4.249E4

C7H15O2-2=C7H14-2+HO2 1.0044E39 -8.11 4.149E4

C7H15O2-3=C7H14-2+HO2 1.0044E39 -8.11 4.149E4

C7H15O2-3=C7H14-3+HO2 1.0044E39 -8.11 4.149E4

C7H15O2-4=C7H14-3+HO2 2.009E39 -8.11 4.149E4

C7H15O2-1=C7H14OOH1-3 2.5E10 0.0 2.045E4

C7H15O2-1=C7H14OOH1-4 3.125E9 0.0 1.865E4

C7H15O2-2=C7H14OOH2-3 2.0E11 0.0 2.645E4

C7H15O2-2=C7H14OOH2-4 2.5E10 0.0 2.045E4

C7H15O2-2=C7H14OOH2-5 3.125E9 0.0 1.865E4

C7H15O2-3=C7H14OOH3-1 3.75E10 0.0 2.4E4

C7H15O2-3=C7H14OOH3-5 2.5E10 0.0 2.045E4

C7H15O2-3=C7H14OOH3-6 3.125E9 0.0 1.865E4

C7H15O2-4=C7H14OOH4-1 9.376E9 0.0 2.195E4

C7H15O2-4=C7H14OOH4-2 5.0E10 0.0 2.045E4

C7H15O2-3+CH3O2=>C7H15O-3+CH3O+O2 1.4E16 -1.61 1.86E3

2C7H15O2-3=>O2+2C7H15O-3 1.4E16 -1.61 1.86E3

C7H15O-3=C2H5CHO+PC4H9 6.573E17 -1.16 1.937E4

REV/1.0E11 0.0E0 1.29E4/

C7H14-2+HO2=C7H14OOH2-3 2.7E3 2.5 1.05E4

C7H14OOH1-3=>C7H14O1-3+OH 7.5E10 0.0 1.525E4

C7H14OOH1-4=>C7H14O1-4+OH 9.375E9 0.0 7.0E3

C7H14OOH2-4=>C7H14O2-4+OH 7.5E10 0.0 1.525E4

C7H14OOH2-5=>C7H14O2-5+OH 9.375E9 0.0 7.0E3

C7H14OOH3-1=>C7H14O1-3+OH 7.5E10 0.0 1.525E4

C7H14OOH3-5=>C7H14O3-5+OH 7.5E10 0.0 1.525E4

C7H14OOH3-6=>C7H14O2-5+OH 9.375E9 0.0 7.0E3

C7H14OOH4-1=>C7H14O1-4+OH 9.375E9 0.0 7.0E3

C7H14OOH4-2=>C7H14O2-4+OH 7.5E10 0.0 1.525E4

C7H14OOH1-3=>OH+CH2O+C6H12-1 2.147E9 1.23 3.037E4

C7H14OOH2-4=>OH+CH3CHO+C5H10-1 1.548E12 0.59 3.009E4

C7H14OOH3-1=>OH+NC4H9CHO+C2H4 8.182E13 -0.13 3.133E4

C7H14OOH3-5=>OH+C2H5CHO+C4H8-1 2.661E13 0.13 3.043E4

C7H14OOH4-2=>OH+NC3H7CHO+C3H6 6.186E13 0.09 3.084E4

C7H14OOH1-3=C4H7OOH1-4+NC3H7 1.609E12 0.54 2.774E4

REV/2.2E3 2.48E0 6.13E3/

C7H14OOH1-4=>C5H10-1+C2H4+HO2 1.446E11 0.69 3.082E4

C7H14OOH1-4=C5H9OOH1-5+C2H5 1.721E12 0.51 2.79E4

REV/2.2E3 2.48E0 6.13E3/

C7H14OOH2-4=C5H9OOH1-4+C2H5 4.08E12 0.32 2.923E4

REV/2.2E3 2.48E0 6.13E3/

C7H14OOH1-3O2=C7H14OOH1-3+O2 1.367E23 -2.37 3.764E4

REV/7.54E12 0.0E0 0.0E0/

C7H14OOH2-4O2=C7H14OOH2-4+O2 1.389E23 -2.38 3.76E4

REV/7.54E12 0.0E0 0.0E0/

C7H14OOH2-5O2=C7H14OOH2-5+O2 1.389E23 -2.38 3.76E4

REV/7.54E12 0.0E0 0.0E0/

C7H14OOH3-1O2=C7H14OOH3-1+O2 3.323E20 -1.65 3.528E4

REV/4.52E12 0.0E0 0.0E0/

C7H14OOH3-5O2=C7H14OOH3-5+O2 1.389E23 -2.38 3.76E4

REV/7.54E12 0.0E0 0.0E0/

C7H14OOH4-2O2=C7H14OOH4-2+O2 6.969E22 -2.38 3.76E4

REV/7.54E12 0.0E0 0.0E0/

C7H14OOH1-3O2=NC7KET13+OH 2.5E10 0.0 2.1E4

C7H14OOH2-4O2=NC7KET24+OH 1.25E10 0.0 1.745E4

C7H14OOH2-5O2=NC7KET25+OH 1.563E9 0.0 1.565E4

C7H14OOH3-1O2=NC7KET31+OH 1.25E10 0.0 1.745E4

C7H14OOH3-5O2=NC7KET35+OH 1.25E10 0.0 1.745E4

C7H14OOH4-2O2=NC7KET42+OH 1.25E10 0.0 1.745E4

NC7KET13=>NC4H9CHO+CH2CHO+OH 1.0E16 0.0 3.9E4

NC7KET24=>NC3H7CHO+CH3COCH2+OH 1.0E16 0.0 3.9E4

NC7KET25=>C2H5CHO+CH2CH2COCH3+OH 1.0E16 0.0 3.9E4

NC7KET31=>CH2O+NC4H9COCH2+OH 1.0E16 0.0 3.9E4

NC7KET35=>C2H5CHO+C2H5COCH2+OH 1.0E16 0.0 3.9E4

NC7KET42=>CH3CHO+NC3H7COCH2+OH 1.0E16 0.0 3.9E4

C7H14O1-3+OH=>C6H12-1+HCO+H2O 2.5E12 0.0 0.0E0

C7H14O1-4+OH=>C5H10-1+CH2CHO+H2O 2.5E12 0.0 0.0E0

C7H14O2-4+OH=>CH3CO+C5H10-1+H2O 2.5E12 0.0 0.0E0

C7H14O2-5+OH=>CH3COCH2+C4H8-1+H2O 2.5E12 0.0 0.0E0

C7H14O3-5+OH=>C2H5CO+C4H8-1+H2O 2.5E12 0.0 0.0E0

C7H14O1-3+OH=>C2H4+NC4H9CO+H2O 2.5E12 0.0 0.0E0

C7H14O1-4+OH=>C2H4+NC3H7COCH2+H2O 2.5E12 0.0 0.0E0

C7H14O2-4+OH=>C3H6+NC3H7CO+H2O 2.5E12 0.0 0.0E0

C7H14O2-5+OH=>C3H6+C2H5COCH2+H2O 2.5E12 0.0 0.0E0

C7H14O1-3+HO2=>C6H12-1+HCO+H2O2 5.0E12 0.0 1.77E4

C7H14O1-4+HO2=>C5H10-1+CH2CHO+H2O2 5.0E12 0.0 1.77E4

C7H14O2-4+HO2=>CH3CO+C5H10-1+H2O2 5.0E12 0.0 1.77E4

C7H14O2-5+HO2=>CH3COCH2+C4H8-1+H2O2 5.0E12 0.0 1.77E4

C7H14O3-5+HO2=>C2H5CO+C4H8-1+H2O2 5.0E12 0.0 1.77E4

C7H14O1-3+HO2=>C2H4+NC4H9CO+H2O2 5.0E12 0.0 1.77E4

C7H14O1-4+HO2=>C2H4+NC3H7COCH2+H2O2 5.0E12 0.0 1.77E4

C7H14O2-4+HO2=>C3H6+NC3H7CO+H2O2 5.0E12 0.0 1.77E4

C7H14O2-5+HO2=>C3H6+C2H5COCH2+H2O2 5.0E12 0.0 1.77E4

NC4H9COCH2=PC4H9+CH2CO 1.554E18 -1.41 4.314E4

REV/1.0E11 0.0E0 1.16E4/

C4H7OOH1-4=C4H7O1-4+OH 2.021E20 -1.53 4.704E4

REV/2.0E13 0.0E0 0.0E0/

C5H9OOH1-4=C5H9O1-4+OH 1.178E20 -1.38 4.605E4

REV/2.0E13 0.0E0 0.0E0/

C5H9OOH1-5=C5H9O1-5+OH 1.594E20 -1.5 4.699E4

REV/2.0E13 0.0E0 0.0E0/

C4H7O1-4=CH2O+C3H5-A 2.412E16 -1.14 7.55E3

REV/1.0E11 0.0E0 1.19E4/

C5H9O1-4=CH3CHO+C3H5-A 7.715E20 -2.43 5.89E3

REV/5.0E10 0.0E0 9.6E3/

C5H9O1-5=CH2O+C4H71-4 4.31E17 -1.33 1.794E4

REV/1.0E11 0.0E0 9.6E3/

O2+C6H12-1=>CH2O+NC4H9CHO 1.0E14 0.0 3.7E4

C6H12-1=2C3H6 4.0E12 0.0 5.8E4

C6H111-3+H=C6H12-1 1.0E14 0.0 0.0E0

PC4H9+C2H3=C6H12-1 1.0E13 0.0 0.0E0

C4H71-4+C2H5=C6H12-1 8.0E12 0.0 0.0E0

C6H111-3+H=C6H12-2 1.0E14 0.0 0.0E0

C6H112-4+H=C6H12-2 1.0E14 0.0 0.0E0

NC3H7+C3H5-T=C6H12-2 1.0E13 0.0 0.0E0

C6H12-1+O2=C6H111-3+HO2 2.2E12 0.0 3.722E4

C6H12-1+O=C6H111-3+OH 6.6E5 2.43 1.21E3

C6H12-2+O2=C6H111-3+HO2 5.5E12 0.0 3.99E4

C6H12-2+O2=C6H112-4+HO2 2.2E12 0.0 3.722E4

C6H12-2+O2=C6H112-5+HO2 2.0E13 0.0 4.964E4

C6H12-2+O2=C6H112-6+HO2 3.0E13 0.0 5.229E4

C6H12-2+O=C6H111-3+OH 4.41E5 2.42 3.15E3

C6H12-2+O=C6H112-4+OH 6.6E5 2.43 1.21E3

C6H12-2+O=C6H112-5+OH 5.51E5 2.45 2.83E3

C6H12-2+O=C6H112-6+OH 9.8E5 2.43 4.75E3

C2H5+C4H6=C6H111-3 8.5E10 0.0 8.3E3

CH3+C5H81-3=C6H112-4 6.0E10 0.0 7.5E3

C3H5-T+C3H6=C6H112-5 6.3E11 0.0 3.1E3

C4H71-3+C2H4=C6H112-6 4.0E11 0.0 1.305E4

C6H112-6=C6H112-4 3.8E10 0.67 2.84E4

C6H112-6=C6H112-5 3.56E10 0.88 3.73E4

C6H113-1=C6H112-4 3.56E10 0.88 2.96E4

C6H112-4+O2=C6H112O2-4 2.0E12 0.0 0.0E0

C6H112-5+O2=C6H112O2-5 7.54E12 0.0 0.0E0

C6H112O2-4=>C6H101-3+HO2 5.04E38 -8.11 4.05E4

C6H112O2-5=>C6H102-4+HO2 1.04E38 -8.11 3.75E4

C6H112O2-4=C6H102OOH4-5 2.0E11 0.0 2.645E4

C6H112O2-5=C6H102OOH5-4 2.0E11 0.0 2.445E4

C6H102OOH4-5=>ETES1+OH 6.0E11 0.0 2.2E4

C6H102OOH5-4=>ETES1+OH 6.0E11 0.0 2.2E4

HO2+C6H102-4=C6H102OOH4-5 3.8E11 0.0 8.8E3

HO2+C6H102-4=C6H102OOH5-4 3.8E11 0.0 7.8E3

O2+ETES1=>HO2+C2H3COCH3+C2H3 2.045E7 2.0 4.072249E4

H+ETES1=>H2+C2H3COCH3+C2H3 2.574E7 2.0 3.95057E3

OH+ETES1=>H2O+C2H3COCH3+C2H3 4.793E6 2.0 -2.25983E3

O+ETES1=>OH+C2H3COCH3+C2H3 1.624E7 2.0 2.57954E3

HO2+ETES1=>H2O2+C2H3COCH3+C2H3 6.465E5 2.0 1.188773E4

HCO+ETES1=>CH2O+C2H3COCH3+C2H3 1.516E6 2.0 1.236044E4

CH3+ETES1=>CH4+C2H3COCH3+C2H3 4.684E5 2.0 4.87129E3

C2H5+ETES1=>C2H6+C2H3COCH3+C2H3 2.758E5 2.0 7.65807E3

CH3O2+ETES1=>CH3O2H+C2H3COCH3+C2H3 9.133E5 2.0 1.236044E4

C6H101-3+H=C6H111-3 2.5E11 0.5 2.62E3

C6H101-3+H=C6H113-1 4.25E11 0.5 1.23E3

C6H101-3+H=C6H112-4 2.5E11 0.5 2.62E3

C6H101-4+H=C6H112-5 4.25E11 0.5 1.23E3

C6H101-4+H=C6H112-6 2.5E11 0.5 2.62E3

C6H101-3+O=>C5H91-3+HCO 2.0E11 0.0 -1.05E3

C6H101-3+OH=>C5H91-3+CH2O 1.0E12 0.0 0.0E0

C6H101-3+OH=>C2H3+C4H6+H2O 2.764E4 2.64 -1.919E3

C6H101-4+OH=>C2H3+C4H6+H2O 2.764E4 2.64 -1.919E3

C6H101-3+HO2=>C2H3+C4H6+H2O2 4.82E3 2.55 1.053E4

C6H101-4+HO2=>C2H3+C4H6+H2O2 4.82E3 2.55 1.053E4

C6H101-3+H=>C2H3+C4H6+H2 3.376E5 2.36 2.07E2

C6H101-4+H=>C2H3+C4H6+H2 3.376E5 2.36 2.07E2

!*********************NOx mech****************************************

N+NO=N2+O 3.5E13 0.0 3.3E2

N+O2=NO+O 2.65E12 0.0 6.4E3

N+OH=NO+H 7.333E13 0.0 1.12E3

N2O+O=N2+O2 1.4E12 0.0 1.081E4

N2O+O=2NO 2.9E13 0.0 2.315E4

N2O+H=N2+OH 4.4E14 0.0 1.888E4

N2O+OH=N2+HO2 2.0E12 0.0 2.106E4

N2O(+M)=N2+O(+M) 1.3E11 0.0 5.962E4

H2O/6.0/

CO2/2.0/

H2/2.0/

CO/1.5/

CH4/2.0/

LOW/6.2E14 0.0E0 5.61E4/

HO2+NO=NO2+OH 2.11E12 0.0 -4.8E2

NO+O+M=NO2+M 1.06E20 -1.41 0.0E0

H2O/6.0/

CO2/2.0/

H2/2.0/

CO/1.5/

CH4/2.0/

NO2+O=NO+O2 3.9E12 0.0 -2.4E2

NO2+H=NO+OH 1.32E14 0.0 3.6E2

END

THERMO ALL

300.000 1000.000 5000.000

H 120186H 1 G 300.0 5000.0 1000.0 1

2.5E0 0.0E0 0.0E0 0.0E0 0.0E0 2

2.547163E4 -4.601176E-1 2.5E0 0.0E0 0.0E0 3

0.0E0 0.0E0 2.547163E4 -4.601176E-1 4

H2 121286H 2 G 300.0 5000.0 1000.0 1

2.991423E0 7.000644E-4 -5.633829E-8 -9.231578E-12 1.582752E-15 2

-8.35034E2 -1.35511E0 3.298124E0 8.249442E-4 -8.143015E-7 3

-9.475434E-11 4.134872E-13 -1.012521E3 -3.294094E0 4

O 120186O 1 G 300.0 5000.0 1000.0 1

2.54206E0 -2.755062E-5 -3.102803E-9 4.551067E-12 -4.368052E-16 2

2.92308E4 4.920308E0 2.946429E0 -1.638166E-3 2.421032E-6 3

-1.602843E-9 3.890696E-13 2.914764E4 2.963995E0 4

O2 121386O 2 G 300.0 5000.0 1000.0 1

3.697578E0 6.135197E-4 -1.258842E-7 1.775281E-11 -1.136435E-15 2

-1.23393E3 3.189166E0 3.212936E0 1.127486E-3 -5.75615E-7 3

1.313877E-9 -8.768554E-13 -1.005249E3 6.034738E0 4

OH -RUCICH 1O 1 G 300.0 5000.0 1710.0 1

2.8537604E0 1.02994334E-3 -2.32666477E-7 1.93750704E-11-3.15759847E-16 2

3.6994972E3 5.78756825E0 3.41896226E0 3.19255801E-4 -3.08292717E-7 3

3.64407494E-10-1.00195479E-13 3.45264448E3 2.54433372E0 4

H2O -20387H 2O 1 G 300.0 5000.0 1000.0 1

2.672146E0 3.056293E-3 -8.73026E-7 1.200996E-10 -6.391618E-15 2

-2.989921E4 6.862817E0 3.386842E0 3.474982E-3 -6.354696E-6 3

6.968581E-9 -2.506588E-12 -3.020811E4 2.590233E0 4

N2 121286N 2 G 300.0 5000.0 1000.0 1

2.92664E0 1.487977E-3 -5.684761E-7 1.009704E-10 -6.753351E-15 2

-9.227977E2 5.980528E0 3.298677E0 1.40824E-3 -3.963222E-6 3

5.641515E-9 -2.444855E-12 -1.0209E3 3.950372E0 4

HO2 L-5-89H 1O 2 G 200.0 3500.0 1000.0 1

4.0172109E0 2.23982013E-3 -6.3365815E-7 1.1424637E-10-1.07908535E-14 2

1.11856713E2 3.78510215E0 4.30179801E0 -4.74912051E-3 2.11582891E-5 3

-2.42763894E-8 9.29225124E-12 2.9480804E2 3.71666245E0 4

H2O2 120186H 2O 2 G 300.0 5000.0 1000.0 1

4.573167E0 4.336136E-3 -1.474689E-6 2.348904E-10 -1.431654E-14 2

-1.800696E4 5.01137E-1 3.388754E0 6.569226E-3 -1.485013E-7 3

-4.625806E-9 2.471515E-12 -1.766315E4 6.785363E0 4

AR 120186AR 1 G 300.0 5000.0 1000.0 1

2.5E0 0.0E0 0.0E0 0.0E0 0.0E0 2

-7.45375E2 4.366001E0 2.5E0 0.0E0 0.0E0 3

0.0E0 0.0E0 -7.45375E2 4.366001E0 4

CO O 1C 1 G 300.0 5000.0 1429.0 1

3.1121689E0 1.15948283E-3 -3.38480362E-7 4.41403098E-11-2.12862228E-15 2

-1.42718539E4 5.71725177E0 3.19036352E0 8.94419972E-4 -3.24927563E-8 3

-1.04599967E-10 2.41965693E-14 -1.42869054E4 5.33277914E0 4

CO2 O 2C 1 G 300.0 5000.0 1380.0 1

5.18953018E0 2.06006476E-3 -7.33575324E-7 1.17004374E-10-6.91729215E-15 2

-4.93178953E4 -5.18289303E0 2.5793049E0 8.24684987E-3 -6.42716047E-6 3

2.54637024E-9-4.12030443E-13 -4.8416283E4 8.81141041E0 4

CH2O -RUSCIH 2O 1C 1 G 300.0 5000.0 1486.0 1

4.02068394E0 5.09903417E-3 -1.7643048E-6 2.76025879E-10-1.60998042E-14 2

-1.49287258E4 1.06525547E0 3.00754197E0 3.04729496E-3 5.25109246E-6 3

-5.12019281E-9 1.27133795E-12 -1.41188397E4 8.10120233E0 4

HCO H 1O 1C 1 G 300.0 5000.0 1690.0 1

3.44148164E0 3.52157719E-3 -1.24136118E-6 1.97328644E-10-1.16538616E-14 2

3.97409684E3 6.24593456E0 3.81049965E0 8.13269825E-4 3.13164701E-6 3

-2.39478268E-9 5.06894554E-13 4.03859901E3 4.94843165E0 4

HO2CHO -THERMH 2O 3C 1 G 300.0 5000.0 1378.0 1

9.87503878E0 4.64663708E-3 -1.67230522E-6 2.68624413E-10-1.59595232E-14 2

-3.80502496E4 -2.24939155E1 2.42464726E0 2.1970638E-2 -1.68705546E-5 3

6.25612194E-9-9.11645843E-13 -3.54828006E4 1.75027796E1 4

O2CHO -THERMH 1O 3C 1 G 300.0 5000.0 1368.0 1

7.24075139E0 4.63312951E-3 -1.63693995E-6 2.59706693E-10-1.52964699E-14 2

-1.87027618E4 -6.49547212E0 3.96059309E0 1.06002279E-2 -5.25713351E-6 3

1.01716726E-9-2.87487602E-14 -1.73599383E4 1.17807483E1 4

HOCHO -THERMH 2O 2C 1 G 300.0 5000.0 1419.0 1

7.6713444E0 4.43426373E-3 -1.60867436E-6 2.5977002E-10-1.54899704E-14 2

-4.8970866E4 -1.73024418E1 1.28069021E0 1.52887758E-2 -5.64150476E-6 3

-1.22968799E-9 8.14273233E-13 -4.64347524E4 1.83142081E1 4

OCHO -THERMH 1O 2C 1 G 300.0 5000.0 1412.0 1

6.4981556E0 3.22319012E-3 -1.17099595E-6 1.89272918E-10 -1.12937E-14 2

-1.81679042E4 -1.00412613E1 1.42991854E0 1.22803284E-2 -5.28461096E-6 3

-3.73026551E-10 5.07953571E-13 -1.62042814E4 1.80411779E1 4

HOCH2O -THERMH 3O 2C 1 G 300.0 5000.0 1452.0 1

6.39521515E0 7.43673043E-3 -2.50422354E-6 3.84879712E-10-2.21778689E-14 2

-2.4110884E4 -6.63865583E0 4.11183145E0 7.53850697E-3 3.7733737E-6 3

-5.38746005E-9 1.45615887E-12 -2.28023001E4 7.46807254E0 4

CH3O -THERMH 3O 1C 1 G 300.0 5000.0 1509.0 1

4.64787019E0 6.90830683E-3 -2.34404776E-6 3.6199457E-10-2.09253541E-14 2

-2.99208881E2 -1.57740193E0 2.23058023E0 8.53178586E-3 1.02166624E-6 3

-3.41046916E-9 9.94691038E-13 9.45939708E2 1.28377569E1 4

CH3O2H -THERMH 4O 2C 1 G 300.0 5000.0 1367.0 1

8.80409289E0 8.09427218E-3 -2.85843274E-6 4.53369754E-10-2.66980707E-14 2

-1.98512174E4 -2.17000591E1 2.83880024E0 1.86096249E-2 -8.48165412E-6 3

1.00387451E-9 1.71612429E-13 -1.74033753E4 1.16092433E1 4

CH3O2 -THERMH 3O 2C 1 G 300.0 5000.0 1365.0 1

6.34718801E0 7.92089358E-3 -2.76601913E-6 4.35360631E-10-2.54984762E-14 2

-1.83436055E3 -7.42552545E0 3.8049759E0 9.8078466E-3 -3.90940624E-7 3

-2.23072602E-9 6.4331082E-13 -4.55625796E2 7.817891E0 4

CH4 H 4C 1 G 300.0 5000.0 1462.0 1

4.09617653E0 7.44330845E-3 -2.638719E-6 4.19577604E-10 -2.4750805E-14 2

-1.13835704E4 -4.67561383E0 3.7211302E0 -2.50293289E-3 1.90246534E-5 3

-1.46871253E-8 3.43791152E-12 -1.01424099E4 1.22776596E0 4

CH3 H 3C 1 G 300.0 5000.0 1389.0 1

3.51281376E0 5.11412613E-3 -1.6763205E-6 2.52495174E-10-1.43302923E-14 2

1.61238027E4 1.62436112E0 3.43858162E0 4.07752664E-3 3.19830994E-7 3

-9.4766939E-10 2.21828166E-13 1.63164018E4 2.52807406E0 4

CH2 120186H 2C 1 G 250.0 4000.0 1000.0 1

3.636408E0 1.933057E-3 -1.687016E-7 -1.009899E-10 1.808256E-14 2

4.534134E4 2.156561E0 3.762237E0 1.159819E-3 2.489585E-7 3

8.800836E-10 -7.332435E-13 4.536791E4 1.712578E0 4

CH2(S) -31287H 2C 1 G 300.0 4000.0 1000.0 1

3.552889E0 2.066788E-3 -1.914116E-7 -1.104673E-10 2.02135E-14 2

4.984975E4 1.68657E0 3.971265E0 -1.699089E-4 1.025369E-6 3

2.492551E-9 -1.981266E-12 4.989368E4 5.753207E-2 4

C2H6 -THERMH 6C 2 G 300.0 5000.0 1383.0 1

6.0597263E0 1.30382837E-2 -4.48103942E-6 6.97762095E-10-4.05606353E-14 2

-1.35751226E4 -1.28608001E1 4.78623203E-2 2.40569127E-2 -1.15155912E-5 3

2.48666238E-9-1.78343944E-13 -1.10923014E4 2.06544071E1 4

C2H5 -THERMH 5C 2 G 300.0 5000.0 1387.0 1

5.8878439E0 1.03076793E-2 -3.46844396E-6 5.32499257E-10-3.06512651E-14 2

1.15065499E4 -8.49651771E0 1.32730217E0 1.76656753E-2 -6.14926558E-6 3

-3.01143466E-10 4.38617775E-13 1.34284028E4 1.71789216E1 4

C2H4 -THERMH 4C 2 G 300.0 5000.0 1395.0 1

5.22176372E0 8.96137303E-3 -3.04868886E-6 4.71465524E-10-2.72739592E-14 2

3.60389679E3 -7.47789234E0 2.33879687E-1 1.96334647E-2 -1.16833214E-5 3

3.64246453E-9-4.77442715E-13 5.46489338E3 1.97084228E1 4

C2H3 -THERMH 3C 2 G 300.0 5000.0 1395.0 1

5.07331248E0 6.58316278E-3 -2.23762924E-6 3.45803379E-10 -1.9994049E-14 2

3.37234748E4 -3.39792712E0 1.25329724E0 1.5625837E-2 -1.07803879E-5 3

4.18054634E-9-7.01360362E-13 3.50734773E4 1.71341661E1 4

C2H2 -THERMH 2C 2 G 300.0 5000.0 1407.0 1

4.98265164E0 4.2599293E-3 -1.37483523E-6 2.04717964E-10 -1.1519174E-14 2

2.52697118E4 -5.81321385E0 2.06742667E0 1.46568506E-2 -1.52947063E-5 3

8.30965761E-9-1.72932175E-12 2.59578589E4 8.62758672E0 4

CH3CHO -THERMH 4O 1C 2 G 300.0 5000.0 1377.0 1

6.98518866E0 9.67897787E-3 -3.31841954E-6 5.16025901E-10-2.99725903E-14 2

-2.39807279E4 -1.27484852E1 1.77060035E0 1.84475161E-2 -7.24138162E-6 3

2.34364561E-10 3.35543891E-13 -2.1807885E4 1.65023437E1 4

CH3CO -THERMH 3O 1C 2 G 300.0 5000.0 1371.0 1

6.56682466E0 7.55308669E-3 -2.59966784E-6 4.05334994E-10-2.35876164E-14 2

-4.76690401E3 -8.83301965E0 2.5288415E0 1.37152173E-2 -4.28607476E-6 3

-7.71684278E-10 4.8383638E-13 -3.02546532E3 1.40340315E1 4

CH2CHO -THERMH 3O 1C 2 G 300.0 5000.0 1388.0 1

7.5414579E0 6.82297125E-3 -2.36938607E-6 3.71633517E-10-2.17160048E-14 2

-2.61437239E3 -1.62602766E1 1.47616956E0 2.08974186E-2 -1.50123552E-5 3

5.62967382E-9 -8.7662447E-13 -4.8205051E2 1.63756465E1 4

CH2CO 121686H 2O 1C 2 G 300.0 5000.0 1000.0 1

6.038817E0 5.80484E-3 -1.920954E-6 2.794485E-10 -1.458868E-14 2

-8.583402E3 -7.657581E0 2.974971E0 1.211871E-2 -2.345046E-6 3

-6.466685E-9 3.905649E-12 -7.632637E3 8.673553E0 4

HCCO -32387H 1O 1C 2 G 300.0 4000.0 1000.0 1

6.758073E0 2.0004E-3 -2.027607E-7 -1.041132E-10 1.965165E-14 2

1.901513E4 -9.071262E0 5.047965E0 4.453478E-3 2.268283E-7 3

-1.482095E-9 2.250742E-13 1.965892E4 4.818439E-1 4

CH3CO3H -THERMH 4O 3C 2 G 300.0 5000.0 1391.0 1

1.25060485E1 9.47789695E-3 -3.30402246E-6 5.19630793E-10-3.04233568E-14 2

-4.59856703E4 -3.79195947E1 2.24135876E0 3.37963514E-2 -2.53887482E-5 3

9.67583587E-9-1.49266157E-12 -4.24677831E4 1.70668133E1 4

CH3CO3 -THERMH 3O 3C 2 G 300.0 5000.0 1391.0 1

1.12522498E1 8.33652672E-3 -2.8901453E-6 4.52781734E-10-2.64354456E-14 2

-2.60238584E4 -2.96370457E1 3.60373432E0 2.70080341E-2 -2.08293438E-5 3

8.50541104E-9 -1.4384611E-12 -2.34205171E4 1.12014914E1 4

CH3CO2 -THERMH 3O 2C 2 G 300.0 5000.0 1395.0 1

8.54059736E0 8.32951214E-3 -2.8472201E-6 4.41927196E-10-2.56373394E-14 2

-2.97290678E4 -2.03883545E1 1.37440768E0 2.49115604E-2 -1.74308894E-5 3

6.24799508E-9-9.09516835E-13 -2.7233015E4 1.81405454E1 4

C2H5O2 -THERMH 5O 2C 2 G 300.0 5000.0 1387.0 1

8.77641329E0 1.18767163E-2 -3.8768305E-6 5.83210754E-10-3.31006724E-14 2

-6.78748703E3 -1.83119972E1 2.58630333E0 2.61836362E-2 -1.68306193E-5 3

6.08749295E-9 -9.5730204E-13 -4.58588992E3 1.50486289E1 4

C2H4O1-2 -THERMH 4O 1C 2 G 300.0 5000.0 1399.0 1

6.99485763E0 1.00772459E-2 -3.45220932E-6 5.36571216E-10-3.11563543E-14 2

-1.04091344E4 -1.59857976E1 -1.4436179E0 2.91837107E-2 -1.96805054E-5 3

6.67472575E-9-9.02139342E-13 -7.43433507E3 2.95212453E1 4

C2H3O1-2 -THERMH 3O 1C 2 G 300.0 5000.0 1492.0 1

6.88486471E0 6.94720501E-3 -2.23214698E-6 3.32190767E-10-1.87124555E-14 2

1.264422E4 -1.2384257E1 -1.62965122E0 2.93455486E-2 -2.4373755E-5 3

1.00522325E-8-1.61259036E-12 1.52459425E4 3.22782741E1 4

CH3COCH2 -THERMH 5O 1C 3 G 300.0 5000.0 1388.0 1

1.08892477E1 1.11540675E-2 -3.85516785E-6 6.02834048E-10-3.51533449E-14 2

-1.00741464E4 -3.18043322E1 1.22337251E0 3.24546742E-2 -2.13542518E-5 3

6.96777735E-9-8.99160299E-13 -6.59419324E3 2.05537233E1 4

C2H3CHO -THERMH 4O 1C 3 G 300.0 5000.0 1393.0 1

1.04184959E1 9.48963321E-3 -3.29310529E-6 5.16279203E-10-3.01587291E-14 2

-1.49630281E4 -3.07235061E1 2.92355162E-1 3.54321417E-2 -2.94936324E-5 3

1.28100124E-8-2.26144108E-12 -1.16521584E4 2.2887828E1 4

C2H3CO -THERMH 3O 1C 3 G 300.0 5000.0 1402.0 1

9.37467676E0 7.912969E-3 -2.6719828E-6 4.1111543E-10-2.36978981E-14 2

1.92969514E3 -2.40892696E1 1.36242013E0 3.15273972E-2 -3.00218935E-5 3

1.48167112E-8 -2.8797153E-12 4.25770215E3 1.72626546E1 4

C2H5CHO -THERMH 6O 1C 3 G 300.0 5000.0 1375.0 1

8.87216223E0 2.01710762E-2 -8.06487647E-6 1.37617784E-9-8.48922325E-14 2

-2.83848527E4 -2.35069163E1 5.9310753E0 8.87943855E-3 2.03764325E-5 3

-1.80149348E-8 4.14085655E-12 -2.51377751E4 -5.87019974E-1 4

C2H5CO -THERMH 5O 1C 3 G 300.0 5000.0 1362.0 1

1.00147418E1 1.61527961E-2 -6.62976122E-6 1.15290667E-9-7.21263458E-14 2

-1.00430305E4 -2.88570933E1 8.35352246E0 -4.08739727E-3 3.64217954E-5 3

-2.72457713E-8 6.06440266E-12 -6.58577307E3 -1.05948346E1 4

HE 120186HE 1 G 300.0 5000.0 1000.0 1

2.5E0 0.0E0 0.0E0 0.0E0 0.0E0 2

-7.45375E2 9.153489E-1 2.5E0 0.0E0 0.0E0 3

0.0E0 0.0E0 -7.45375E2 9.153488E-1 4

NC3H7 -THERMH 7C 3 G 300.0 5000.0 1386.0 1

8.88635047E0 1.52273279E-2 -5.2190586E-6 8.11259208E-10-4.71028059E-14 2

7.34671584E3 -2.30727791E1 4.74365329E-1 3.19190367E-2 -1.7190978E-5 3

4.45927887E-9-4.36675398E-13 1.06314565E4 2.32670929E1 4

C3H6 -THERMH 6C 3 G 300.0 5000.0 1388.0 1

8.01595958E0 1.37023634E-2 -4.66249733E-6 7.21254402E-10-4.17370126E-14 2

-1.76749303E3 -2.00160668E1 3.94615444E-1 2.89107662E-2 -1.54886808E-5 3

3.88814209E-9-3.37890352E-13 1.17760132E3 2.19003736E1 4

C3H5-A -THERMH 5C 3 G 300.0 5000.0 1397.0 1

8.45883958E0 1.12695483E-2 -3.83792864E-6 5.94059119E-10 -3.4391803E-14 2

1.64683289E4 -2.32704266E1 -5.29131958E-1 3.345591E-2 -2.53401027E-5 3

1.02865754E-8 -1.7325834E-12 1.94941423E4 2.46172315E1 4

C3H5-S -THERMH 5C 3 G 300.0 5000.0 1390.0 1

7.88765879E0 1.13012591E-2 -3.8421313E-6 5.93982677E-10-3.43567175E-14 2

2.83484913E4 -1.74291589E1 1.32807335E0 2.53107914E-2 -1.51530439E-5 3

4.74345565E-9-6.24666084E-13 3.079811E4 1.83328787E1 4

C3H5-T -THERMH 5C 3 G 300.0 5000.0 1382.0 1

7.37492443E0 1.17510061E-2 -4.00021283E-6 6.18947395E-10-3.58215018E-14 2

2.73982108E4 -1.43478655E1 2.17916644E0 2.03826623E-2 -7.91413834E-6 3

4.76906187E-10 2.70398536E-13 2.96002535E4 1.48785684E1 4

C3H4-A 101993H 4C 3 G 300.0 4000.0 1400.0 1

9.776256E0 5.302138E-3 -3.701118E-7 -3.026386E-10 5.089581E-14 2

1.954972E4 -3.077061E1 2.539831E0 1.633437E-2 -1.76495E-6 3

-4.647365E-9 1.729131E-12 2.251243E4 9.935702E0 4

C3H5O -THERMH 5O 1C 3 G 300.0 5000.0 1380.0 1

1.02551752E1 1.1498372E-2 -3.84645659E-6 5.88910346E-10-3.38557923E-14 2

6.2656081E3 -2.77655042E1 1.19822582E0 3.05579837E-2 -1.80630276E-5 3

4.86150033E-9-4.19854562E-13 9.58217784E3 2.15566221E1 4

C3H6OOH1-2 -THERMH 7O 2C 3 G 300.0 5000.0 1402.0 1

1.24605763E1 1.58889526E-2 -5.32742106E-6 8.15818791E-10 -4.6872325E-14 2

-4.20305196E3 -3.23858947E1 2.87774562E0 3.74166999E-2 -2.36058063E-5 3

7.7993086E-9-1.06042562E-12 -7.82368119E2 1.9394134E1 4

C3H6OOH1-3 -THERMH 7O 2C 3 G 300.0 5000.0 1384.0 1

1.46881564E1 1.499412E-2 -5.24056505E-6 8.25462711E-10-4.83758952E-14 2

-4.77342863E3 -4.77984492E1 1.88331465E0 4.40156051E-2 -3.07858462E-5 3

1.13214862E-8-1.75323184E-12 -1.68779168E2 2.14040621E1 4

C3H6OOH1-2O2 -0-TRMH 7O 4C 3 G 300.0 5000.0 1386.0 1

1.91759159E1 1.59857013E-2 -5.61306378E-6 8.86880495E-10 -5.2087704E-14 2

-2.64412115E4 -6.77512936E1 2.65196584E0 5.74638149E-2 -4.72190867E-5 3

2.05591557E-8-3.68787387E-12 -2.08829371E4 2.01547955E1 4

C3H6OOH1-3O2 -0-TRMH 7O 4C 3 G 300.0 5000.0 1382.0 1

1.85916698E1 1.65328553E-2 -5.81343626E-6 9.19396939E-10-5.40320702E-14 2

-2.39598698E4 -6.42544402E1 3.14864588E0 5.33542571E-2 -4.08330611E-5 3

1.6754222E-8-2.89288326E-12 -1.85473645E4 1.86305431E1 4

NC3H7O2 -THERMH 7O 2C 3 G 300.0 5000.0 1384.0 1

1.26327059E1 1.69910726E-2 -5.88866873E-6 9.22195396E-10-5.38230675E-14 2

-1.19194652E4 -3.85349297E1 2.10731492E0 3.96164986E-2 -2.49491599E-5 3

8.594503E-9 -1.3124033E-12 -7.93745567E3 1.89082748E1 4

C3H6O1-3 -THERMH 6O 1C 3 G 300.0 5000.0 2035.0 1

1.02363953E1 1.50514705E-2 -5.63636534E-6 9.32463455E-10-5.66102441E-14 2

-1.46212029E4 -3.36724732E1 -2.75717996E0 4.26371602E-2 -2.56831231E-5 3

6.62981208E-9-5.31193325E-13 -1.00990375E4 3.67181804E1 4

C3KET12 -THERMH 6O 3C 3 G 300.0 5000.0 1388.0 1

1.70756225E1 1.31013491E-2 -4.61949408E-6 7.31991329E-10-4.30788679E-14 2

-4.17008637E4 -5.95778952E1 1.10507238E0 5.27396706E-2 -4.31805774E-5 3

1.81618292E-8-3.10535568E-12 -3.63627536E4 2.54111636E1 4

C3KET13 -THERMH 6O 3C 3 G 300.0 5000.0 1379.0 1

1.58927479E1 1.40990923E-2 -4.96118851E-6 7.84992198E-10-4.61488928E-14 2

-3.93774829E4 -5.26049341E1 3.55241022E0 4.1872027E-2 -2.9455037E-5 3

1.099829E-8-1.75045977E-12 -3.48902671E4 1.42082894E1 4

CH3CHCO -THERMH 4O 1C 3 G 300.0 5000.0 1400.0 1

1.00219123E1 9.569663E-3 -3.26221644E-6 5.05231706E-10-2.92593257E-14 2

-1.42482738E4 -2.77829973E1 1.48380119E0 3.22203013E-2 -2.70250033E-5 3

1.20499164E-8-2.18365931E-12 -1.1527654E4 1.71552068E1 4

C4H8-1 -THERMH 8C 4 G 300.0 5000.0 1391.0 1

1.13456574E1 1.80843428E-2 -6.17276514E-6 9.56925815E-10-5.54586212E-14 2

-5.8865945E3 -3.64627206E1 -8.33377133E-1 4.54141123E-2 -2.9760903E-5 3

1.03518354E-8-1.51975733E-12 -1.49161811E3 2.94327905E1 4

C4H8-2 -THERMH 8C 4 G 300.0 5000.0 1384.0 1

1.07864376E1 1.84629194E-2 -6.2828949E-6 9.72052191E-10-5.62579166E-14 2

-7.11649782E3 -3.44892763E1 6.69213599E-1 3.76839941E-2 -1.85689683E-5 3

3.69571062E-9-1.03095209E-13 -3.11675402E3 2.14868169E1 4

PC4H9 -THERMH 9C 4 G 300.0 5000.0 1391.0 1

1.20779744E1 1.96264778E-2 -6.71302199E-6 1.04206424E-9-6.04469282E-14 2

3.22550473E3 -3.87719384E1 3.20730933E-1 4.34654454E-2 -2.4058497E-5 3

6.28245308E-9-5.80113166E-13 7.71490893E3 2.57301085E1 4

C4H71-3 -THERMH 7C 4 G 300.0 5000.0 1392.0 1

1.0947017E1 1.63724387E-2 -5.598962E-6 8.69147693E-10-5.04214389E-14 2

1.11181741E4 -3.549084E1 -1.12475112E0 4.34882854E-2 -2.87750454E-5 3

9.88046971E-9-1.40120341E-12 1.5442016E4 2.97651156E1 4

C4H71-4 -THERMH 7C 4 G 300.0 5000.0 1392.0 1

1.09215027E1 1.59294073E-2 -5.43642246E-6 8.42695797E-10-4.88353299E-14 2

1.90921144E4 -3.12721325E1 -4.09581101E-2 4.06024409E-2 -2.67339769E-5 3

9.28995844E-9-1.35368138E-12 2.30309664E4 2.79985374E1 4

C4H6 -THERMH 6C 4 G 300.0 5000.0 1398.0 1

1.11633789E1 1.37163965E-2 -4.69715783E-6 7.29693836E-10-4.23486203E-14 2

7.7903977E3 -3.69847949E1 -1.43095121E0 4.78706062E-2 -4.154468E-5 3

1.91549552E-8-3.57158507E-12 1.17551314E4 2.90825833E1 4

PC4H9O2 -THERMH 9O 2C 4 G 300.0 5000.0 1385.0 1

1.57845448E1 2.1521091E-2 -7.44909017E-6 1.16558071E-9-6.79885609E-14 2

-1.60146054E4 -5.40388525E1 1.9436365E0 5.15513163E-2 -3.282844E-5 3

1.1306486E-8-1.70118606E-12 -1.08358103E4 2.13503149E1 4

C4H8OOH1-3 -THERMH 9O 2C 4 G 300.0 5000.0 1377.0 1

1.7644217E1 1.91706536E-2 -6.57168641E-6 1.02246571E-9-5.94304735E-14 2

-1.0185928E4 -6.17115813E1 1.94106276E0 5.18789351E-2 -3.10411683E-5 3

8.63568881E-9-8.42841994E-13 -4.34315962E3 2.40230471E1 4

C2H5COCH2 -THERMH 7O 1C 4 G 300.0 5000.0 1383.0 1

1.42098738E1 1.57866459E-2 -5.50529183E-6 8.6587054E-10-5.06913329E-14 2

-1.41284951E4 -4.87132911E1 1.54013856E0 4.39486258E-2 -2.97002421E-5 3

1.05495313E-8-1.58598769E-12 -9.50796505E3 1.99706641E1 4

CH2CH2COCH3 5-THERH 7O 1C 4 G 300.0 5000.0 1380.0 1

1.24694368E1 1.71022143E-2 -5.92156726E-6 9.26816806E-10-5.40730504E-14 2

-1.01378242E4 -3.62186375E1 2.40255609E0 3.67294268E-2 -1.9731651E-5 3

5.07323216E-9-4.99655275E-13 -6.15006886E3 1.93993386E1 4

CH3CHCOCH3 -THERMH 7O 1C 4 G 300.0 5000.0 1384.0 1

1.31388032E1 1.66091073E-2 -5.76924215E-6 9.04978165E-10-5.28826527E-14 2

-1.51162098E4 -4.3887658E1 8.12941079E-1 4.29256944E-2 -2.69230252E-5 3

8.59326807E-9-1.13188129E-12 -1.05247481E4 2.32952685E1 4

C2H3COCH3 -THERMH 6O 1C 4 G 300.0 5000.0 1386.0 1

1.25571995E1 1.49672645E-2 -5.20015351E-6 8.15864365E-10-4.76824406E-14 2

-2.14622958E4 -4.01434299E1 2.45578501E-1 4.26432049E-2 -2.91126822E-5 3

1.03478392E-8-1.53551381E-12 -1.70305379E4 2.64430799E1 4

NC3H7CHO -THERMH 8O 1C 4 G 300.0 5000.0 1378.0 1

1.35988068E1 1.81652474E-2 -6.17844458E-6 9.55980208E-10-5.53442958E-14 2

-3.15845348E4 -4.51790228E1 1.87415959E0 4.19240315E-2 -2.35148779E-5 3

6.26913673E-9-6.09443908E-13 -2.71032194E4 1.91568574E1 4

NC3H7CO -THERMH 7O 1C 4 G 300.0 5000.0 1380.0 1

1.30026331E1 1.63104877E-2 -5.57642899E-6 8.65670629E-10-5.02255667E-14 2

-1.25523385E4 -4.02608515E1 2.67256826E0 3.71198825E-2 -2.06862859E-5 3

5.48873888E-9-5.35864183E-13 -8.58050888E3 1.6484895E1 4

SC3H5CO -THERMH 5O 1C 4 G 300.0 5000.0 1392.0 1

1.25514754E1 1.22521948E-2 -4.22382101E-6 6.59184896E-10-3.83818826E-14 2

-4.25349795E3 -4.02864145E1 1.74191343E0 3.97229536E-2 -3.20061901E-5 3

1.38227925E-8-2.46272017E-12 -6.644281E2 1.70762023E1 4

C5H11-1 -THERMH 11C 5 G 300.0 5000.0 1396.0 1

1.54992372E1 2.38273176E-2 -8.13845161E-6 1.26220569E-9-7.31730066E-14 2

-1.00988975E3 -5.58563592E1 -9.94216435E-1 5.99860809E-2 -3.78318587E-5 3

1.21310895E-8-1.57042863E-12 4.97697538E3 3.35998032E1 4

C5H11-2 -THERMH 11C 5 G 300.0 5000.0 1391.0 1

1.48744992E1 2.40593799E-2 -8.15587903E-6 1.25867109E-9-7.27223868E-14 2

-2.14733945E3 -5.17907576E1 7.25187788E-1 4.97343569E-2 -2.18806076E-5 3

2.09007834E-9 6.62752863E-13 3.4641837E3 2.67485348E1 4

C5H10-1 -THERMH 10C 5 G 300.0 5000.0 1392.0 1

1.45851539E1 2.24072471E-2 -7.63348025E-6 1.18188966E-9-6.84385139E-14 2

-1.00898205E4 -5.23683936E1 -1.06223481E0 5.74218294E-2 -3.7448689E-5 3

1.27364989E-8-1.79609789E-12 -4.46546666E3 3.2273979E1 4

C5H81-3 -THERMH 8C 5 G 300.0 5000.0 1396.0 1

1.4557449E1 1.80939266E-2 -6.21671892E-6 9.67920254E-10-5.62629326E-14 2

1.22365462E3 -5.43889766E1 -2.32617433E0 6.38696042E-2 -5.57052591E-5 3

2.5804948E-8-4.83405924E-12 6.55183321E3 3.42036513E1 4

C5H91-3 -THERMH 9C 5 G 300.0 5000.0 1392.0 1

1.41860454E1 2.07128899E-2 -7.06960617E-6 1.09607133E-9-6.35322208E-14 2

7.00496135E3 -5.14501773E1 -1.3801395E0 5.57608487E-2 -3.70143928E-5 3

1.26883901E-8-1.78538835E-12 1.25589824E4 3.26441304E1 4

C5H11O2-1 -THERMH 11O 2C 5 G 300.0 5000.0 1386.0 1

1.89702536E1 2.60355552E-2 -9.00706834E-6 1.40888868E-9-8.21618381E-14 2

-2.01253683E4 -6.97477616E1 1.39788038E0 6.52788893E-2 -4.34224032E-5 3

1.57151743E-8-2.46631324E-12 -1.36791222E4 2.55411824E1 4

C5H10OOH1-4 0-THRMH 11O 2C 5 G 300.0 5000.0 1379.0 1

2.09225281E1 2.34863057E-2 -8.0364442E-6 1.24880724E-9-7.25227776E-14 2

-1.4324568E4 -7.79152904E1 1.66304681E0 6.42511734E-2 -3.94124754E-5 3

1.15348101E-8-1.25128422E-12 -7.22288006E3 2.70063739E1 4

C5H10O1-4 -THERMH 10O 1C 5 G 300.0 5000.0 1371.0 1

1.77074517E1 2.24725523E-2 -7.98404192E-6 1.27146816E-9-7.50866945E-14 2

-3.63066445E4 -7.2739256E1 -3.94205066E0 6.68440102E-2 -4.09940878E-5 3

1.17684771E-8 -1.2602987E-12 -2.80943137E4 4.5861715E1 4

C6H13-1 -THERMH 13C 6 G 300.0 5000.0 1390.0 1

1.8538547E1 2.83107962E-2 -9.65307246E-6 1.49547585E-9-8.66336064E-14 2

-5.09299041E3 -7.04490943E1 -2.04871465E-1 6.83801272E-2 -4.14447912E-5 3

1.26155802E-8-1.53120058E-12 1.83280393E3 3.16075093E1 4

C6H13-2 -THERMH 13C 6 G 300.0 5000.0 1380.0 1

1.83687363E1 2.8026811E-2 -9.47032396E-6 1.45888527E-9-8.42002461E-14 2

-6.46093974E3 -6.90934018E1 2.29560149E-1 6.33327323E-2 -3.24135431E-5 3

6.46387687E-9-9.61420427E-14 5.25639156E2 3.08006138E1 4

C6H12-1 -THERMH 12C 6 G 300.0 5000.0 1392.0 1

1.78337529E1 2.67377658E-2 -9.10036773E-6 1.40819768E-9-8.15124244E-14 2

-1.4206286E4 -6.83818851E1 -1.35275205E0 6.98655426E-2 -4.59408022E-5 3

1.56967343E-8-2.21296175E-12 -7.34368617E3 3.53120691E1 4

C6H12-2 -THERMH 12C 6 G 300.0 5000.0 1390.0 1

1.73616148E1 2.71634902E-2 -9.25249439E-6 1.43247725E-9-8.29472521E-14 2

-1.55509547E4 -6.61857343E1 -8.3781052E-1 6.64334712E-2 -4.08801772E-5 3

1.27558015E-8-1.60665165E-12 -8.86347329E3 3.277852E1 4

C6H111-3 -THERMH 11C 6 G 300.0 5000.0 1392.0 1

1.74385677E1 2.50390443E-2 -8.53480314E-6 1.32209951E-9 -7.6589292E-14 2

2.88667463E3 -6.74868036E1 -1.68400759E0 6.82608096E-2 -4.55829418E-5 3

1.56920477E-8-2.21118204E-12 9.68283708E3 3.57445494E1 4

C6H112-4 -THERMH 11C 6 G 300.0 5000.0 1389.0 1

1.69675593E1 2.54635235E-2 -8.68644122E-6 1.346297E-9-7.80191162E-14 2

1.54157079E3 -6.52971106E1 -1.16992307E0 6.48326433E-2 -4.05262795E-5 3

1.27524726E-8-1.60498435E-12 8.16316429E3 3.32148832E1 4

C6H112-5 -THERMH 11C 6 G 300.0 5000.0 1377.0 1

1.6781809E1 2.47356833E-2 -8.34368101E-6 1.28402955E-9-7.40627547E-14 2

8.13809667E3 -5.978108E1 4.63606027E-1 5.63992E-2 -2.87342339E-5 3

5.59014813E-9 -3.5795753E-14 1.44272349E4 3.01101704E1 4

C6H112-6 -THERMH 11C 6 G 300.0 5000.0 1390.0 1

1.69431052E1 2.50224953E-2 -8.52515322E-6 1.32009254E-9-7.64493285E-14 2

9.51557475E3 -6.10792812E1 -1.06006806E-1 6.20508067E-2 -3.86460745E-5 3

1.22632255E-8 -1.5799299E-12 1.57546498E4 3.15418771E1 4

C6H113-1 -THERMH 11C 6 G 300.0 5000.0 1392.0 1

1.70133131E1 2.50666461E-2 -8.56223877E-6 1.32807194E-9-7.69999372E-14 2

9.53859681E3 -6.1392094E1 -9.77623834E-1 6.56664597E-2 -4.36212067E-5 3

1.51941737E-8-2.20544154E-12 1.59778322E4 3.5817706E1 4

C6H13O2-1 -THERMH 13O 2C 6 G 300.0 5000.0 1387.0 1

2.2122482E1 3.0560971E-2 -1.05650154E-5 1.65180006E-9-9.62963346E-14 2

-2.42219722E4 -8.52560175E1 1.24283154E0 7.71349324E-2 -5.1154939E-5 3

1.83242032E-8-2.83058645E-12 -1.65776531E4 2.79518801E1 4

NC4H9CHO -THERMH 10O 1C 5 G 300.0 5000.0 1381.0 1

1.67965163E1 2.25684519E-2 -7.67631588E-6 1.18769369E-9-6.87545554E-14 2

-3.5682608E4 -6.09063312E1 1.59663472E0 5.43541416E-2 -3.21020651E-5 3

9.35773559E-9-1.06688932E-12 -2.99841025E4 2.21281498E1 4

NC4H9CO -THERMH 9O 1C 5 G 300.0 5000.0 1382.0 1

1.61782939E1 2.0799192E-2 -7.11787892E-6 1.10559975E-9-6.41697187E-14 2

-1.66537752E4 -5.58943579E1 2.43530238E0 4.93682376E-2 -2.89883082E-5 3

8.42863812E-9-9.68287172E-13 -1.14675541E4 1.92695879E1 4

NC3H7COCH2 -THERMH 9O 1C 5 G 300.0 5000.0 1389.0 1

1.61502419E1 2.14093466E-2 -7.36059614E-6 1.14656816E-9-6.66712722E-14 2

-1.76968561E4 -5.83864884E1 9.58299271E-1 5.68162532E-2 -3.99112781E-5 3

1.52671514E-8-2.49221047E-12 -1.23062238E4 2.34112884E1 4

NC7H16 -THERMH 16C 7 G 300.0 5000.0 1391.0 1

2.22148969E1 3.4767575E-2 -1.18407129E-5 1.83298478E-9-1.06130266E-13 2

-3.42760081E4 -9.23040196E1 -1.26836187E0 8.5435582E-2 -5.25346786E-5 3

1.62945721E-8-2.02394925E-12 -2.56586565E4 3.53732912E1 4

C7H15-1 -THERMH 15C 7 G 300.0 5000.0 1390.0 1

2.17940709E1 3.26280243E-2 -1.11138244E-5 1.72067148E-9-9.96366999E-14 2

-9.20938221E3 -8.64954311E1 -4.99570406E-1 8.08826467E-2 -5.00532754E-5 3

1.56549308E-8-1.96616227E-12 -1.04590223E3 3.46564011E1 4

C7H15-2 -THERMH 15C 7 G 300.0 5000.0 1382.0 1

2.16368842E1 3.23324804E-2 -1.09273807E-5 1.6835706E-9-9.71774091E-14 2

-1.05873616E4 -8.52209653E1 -3.79155767E-2 7.5672657E-2 -4.07473634E-5 3

9.32678943E-9-4.92360745E-13 -2.35605303E3 3.37321506E1 4

C7H15-3 -THERMH 15C 7 G 300.0 5000.0 1382.0 1

2.16368842E1 3.23324804E-2 -1.09273807E-5 1.6835706E-9-9.71774091E-14 2

-1.05873616E4 -8.52209653E1 -3.79155767E-2 7.5672657E-2 -4.07473634E-5 3

9.32678943E-9-4.92360745E-13 -2.35605303E3 3.37321506E1 4

C7H15-4 -THERMH 15C 7 G 300.0 5000.0 1382.0 1

2.16368842E1 3.23324804E-2 -1.09273807E-5 1.6835706E-9-9.71774091E-14 2

-1.05873616E4 -8.5910447E1 -3.79155767E-2 7.5672657E-2 -4.07473634E-5 3

9.32678943E-9-4.92360745E-13 -2.35605303E3 3.3042669E1 4

C7H14-1 -THERMH 14C 7 G 300.0 5000.0 1392.0 1

2.10898039E1 3.10607878E-2 -1.05644793E-5 1.6340578E-9-9.45598219E-14 2

-1.83260065E4 -8.44391108E1 -1.67720549E0 8.24611601E-2 -5.46504108E-5 3

1.87862303E-8-2.65737983E-12 -1.02168601E4 3.85068032E1 4

C7H14-2 -THERMH 14C 7 G 300.0 5000.0 1390.0 1

2.06192047E1 3.14852991E-2 -1.07162057E-5 1.65827662E-9-9.59911785E-14 2

-1.96713162E4 -8.22519387E1 -1.16533279E0 7.90439806E-2 -4.96101666E-5 3

1.58569009E-8-2.05346433E-12 -1.17362359E4 3.5987107E1 4

C7H14-3 -THERMH 14C 7 G 300.0 5000.0 1392.0 1

2.0682275E1 3.15388629E-2 -1.07571215E-5 1.6669026E-9-9.65810393E-14 2

-1.96450604E4 -8.25235002E1 -2.03026994E0 8.26324377E-2 -5.45514471E-5 3

1.87705822E-8 -2.6757122E-12 -1.15141029E4 4.02316266E1 4

C7H132-4 -THERMH 13C 7 G 300.0 5000.0 1390.0 1

2.02283723E1 2.97818393E-2 -1.01488201E-5 1.57187813E-9-9.10500113E-14 2

-2.71119859E3 -8.13824175E1 -1.50555526E0 7.7475894E-2 -4.92982536E-5 3

1.58761889E-8-2.05624822E-12 5.16084218E3 3.64615905E1 4

C7H133-5 -THERMH 13C 7 G 300.0 5000.0 1392.0 1

2.02852E1 2.98429179E-2 -1.01927262E-5 1.58100534E-9-9.16702393E-14 2

-2.66699385E3 -8.16175392E1 -2.36092106E0 8.10269808E-2 -5.41952361E-5 3

1.87683817E-8-2.67470772E-12 5.39652999E3 4.06609319E1 4

C7H13O2-4 -THERMH 13O 1C 7 G 300.0 5000.0 1389.0 1

2.48888884E1 2.71728188E-2 -9.10354489E-6 1.3955538E-9-8.03103189E-14 2

-1.45377934E4 -1.02121928E2 -2.38155227E0 9.12476056E-2 -6.58712429E-5 3

2.39221243E-8-3.45819168E-12 -5.23001862E3 4.39988302E1 4

C7H15O2-1 -THERMH 15O 2C 7 G 300.0 5000.0 1388.0 1

2.52656556E1 3.50803587E-2 -1.21178801E-5 1.89360806E-9-1.10354125E-13 2

-2.81113392E4 -1.00704794E2 1.20888552E0 8.84061706E-2 -5.7986126E-5 3

2.03574689E-8-3.06460336E-12 -1.92918765E4 2.98117097E1 4

C7H15O2-2 -THERMH 15O 2C 7 G 300.0 5000.0 1390.0 1

2.6053564E1 3.43831688E-2 -1.18713247E-5 1.85450241E-9-1.08052399E-13 2

-3.06842095E4 -1.05407563E2 3.55252917E-1 9.42381007E-2 -6.66955106E-5 3

2.54795583E-8-4.13211105E-12 -2.15795254E4 3.29433435E1 4

C7H15O2-3 -THERMH 15O 2C 7 G 300.0 5000.0 1390.0 1

2.6053564E1 3.43831688E-2 -1.18713247E-5 1.85450241E-9-1.08052399E-13 2

-3.06842095E4 -1.05407563E2 3.55252917E-1 9.42381007E-2 -6.66955106E-5 3

2.54795583E-8-4.13211105E-12 -2.15795254E4 3.29433435E1 4

C7H15O2-4 -THERMH 15O 2C 7 G 300.0 5000.0 1390.0 1

2.6053564E1 3.43831688E-2 -1.18713247E-5 1.85450241E-9-1.08052399E-13 2

-3.06842095E4 -1.06097045E2 3.55252917E-1 9.42381007E-2 -6.66955106E-5 3

2.54795583E-8-4.13211105E-12 -2.15795254E4 3.22538619E1 4

C7H15O-3 -THERMH 15O 1C 7 G 300.0 5000.0 1395.0 1

2.43070968E1 3.31267815E-2 -1.13034023E-5 1.75198875E-9-1.01526945E-13 2

-2.88623481E4 -9.8736086E1 -1.09087925E0 9.23217022E-2 -6.44477835E-5 3

2.36808474E-8-3.61067567E-12 -1.99926675E4 3.77738325E1 4

C7H14OOH1-3 -THERMH 15O 2C 7 G 300.0 5000.0 1383.0 1

2.72290222E1 3.24921901E-2 -1.11259758E-5 1.72928878E-9-1.00428326E-13 2

-2.2497707E4 -1.08901784E2 1.11146206E0 8.91595392E-2 -5.67352382E-5 3

1.78890094E-8-2.22260206E-12 -1.29868314E4 3.29200052E1 4

C7H14OOH1-4 -THERMH 15O 2C 7 G 300.0 5000.0 1383.0 1

2.72290222E1 3.24921901E-2 -1.11259758E-5 1.72928878E-9-1.00428326E-13 2

-2.2497707E4 -1.08901784E2 1.11146206E0 8.91595392E-2 -5.67352382E-5 3

1.78890094E-8-2.22260206E-12 -1.29868314E4 3.29200052E1 4

C7H14OOH2-3 -THERMH 15O 2C 7 G 300.0 5000.0 1389.0 1

2.74034778E1 3.27527893E-2 -1.1299177E-5 1.76444649E-9-1.02786945E-13 2

-2.48636651E4 -1.10201978E2 8.49786005E-1 9.25107196E-2 -6.25359834E-5 3

2.1788039E-8-3.12720398E-12 -1.53640679E4 3.32997487E1 4

C7H14OOH2-4 -THERMH 15O 2C 7 G 300.0 5000.0 1389.0 1

2.74034778E1 3.27527893E-2 -1.1299177E-5 1.76444649E-9-1.02786945E-13 2

-2.48636651E4 -1.10201978E2 8.49786005E-1 9.25107196E-2 -6.25359834E-5 3

2.1788039E-8-3.12720398E-12 -1.53640679E4 3.32997487E1 4

C7H14OOH2-5 -THERMH 15O 2C 7 G 300.0 5000.0 1389.0 1

2.74034778E1 3.27527893E-2 -1.1299177E-5 1.76444649E-9-1.02786945E-13 2

-2.48636651E4 -1.10201978E2 8.49786005E-1 9.25107196E-2 -6.25359834E-5 3

2.1788039E-8-3.12720398E-12 -1.53640679E4 3.32997487E1 4

C7H14OOH3-1 -THERMH 15O 2C 7 G 300.0 5000.0 1390.0 1

2.81418167E1 3.23810222E-2 -1.12264895E-5 1.75881065E-9 -1.0268743E-13 2

-2.37649208E4 -1.14883305E2 1.51527018E-1 9.84303098E-2 -7.2055513E-5 3

2.7853513E-8-4.48821028E-12 -1.401256E4 3.53720992E1 4

C7H14OOH3-5 -THERMH 15O 2C 7 G 300.0 5000.0 1389.0 1

2.74034778E1 3.27527893E-2 -1.1299177E-5 1.76444649E-9-1.02786945E-13 2

-2.48636651E4 -1.10201978E2 8.49786005E-1 9.25107196E-2 -6.25359834E-5 3

2.1788039E-8-3.12720398E-12 -1.53640679E4 3.32997487E1 4

C7H14OOH3-6 -THERMH 15O 2C 7 G 300.0 5000.0 1389.0 1

2.74034778E1 3.27527893E-2 -1.1299177E-5 1.76444649E-9-1.02786945E-13 2

-2.48636651E4 -1.10201978E2 8.49786005E-1 9.25107196E-2 -6.25359834E-5 3

2.1788039E-8-3.12720398E-12 -1.53640679E4 3.32997487E1 4

C7H14OOH4-1 -THERMH 15O 2C 7 G 300.0 5000.0 1390.0 1

2.81418167E1 3.23810222E-2 -1.12264895E-5 1.75881065E-9 -1.0268743E-13 2

-2.37649208E4 -1.15572787E2 1.51527018E-1 9.84303098E-2 -7.2055513E-5 3

2.7853513E-8-4.48821028E-12 -1.401256E4 3.46826176E1 4

C7H14OOH4-2 -THERMH 15O 2C 7 G 300.0 5000.0 1389.0 1

2.74034778E1 3.27527893E-2 -1.1299177E-5 1.76444649E-9-1.02786945E-13 2

-2.48636651E4 -1.1089146E2 8.49786005E-1 9.25107196E-2 -6.25359834E-5 3

2.1788039E-8-3.12720398E-12 -1.53640679E4 3.26102671E1 4

C7H14OOH1-3O2 -0-TRMH 15O 4C 7 G 300.0 5000.0 1388.0 1

3.20144349E1 3.40055996E-2 -1.18415856E-5 1.86060347E-9-1.08851012E-13 2

-4.27171859E4 -1.31118243E2 1.89718004E0 1.06229796E-1 -8.02770218E-5 3

3.23649093E-8-5.45850472E-12 -3.22790229E4 3.02474612E1 4

C7H14OOH2-4O2 -0-TRMH 15O 4C 7 G 300.0 5000.0 1390.0 1

3.28358296E1 3.32767285E-2 -1.15833285E-5 1.81958638E-9-1.06434419E-13 2

-4.52873003E4 -1.3597571E2 1.40912479E0 1.10720834E-1 -8.71178075E-5 3

3.63662749E-8-6.28350689E-12 -3.46304788E4 3.16223383E1 4

C7H14OOH2-5O2 -0-TRMH 15O 4C 7 G 300.0 5000.0 1390.0 1

3.28358296E1 3.32767285E-2 -1.15833285E-5 1.81958638E-9-1.06434419E-13 2

-4.52873003E4 -1.3597571E2 1.40912479E0 1.10720834E-1 -8.71178075E-5 3

3.63662749E-8-6.28350689E-12 -3.46304788E4 3.16223383E1 4

C7H14OOH3-1O2 -0-TRMH 15O 4C 7 G 300.0 5000.0 1388.0 1

3.20144349E1 3.40055996E-2 -1.18415856E-5 1.86060347E-9-1.08851012E-13 2

-4.27171859E4 -1.31118243E2 1.89718004E0 1.06229796E-1 -8.02770218E-5 3

3.23649093E-8-5.45850472E-12 -3.22790229E4 3.02474612E1 4

C7H14OOH3-5O2 -0-TRMH 15O 4C 7 G 300.0 5000.0 1390.0 1

3.28358296E1 3.32767285E-2 -1.15833285E-5 1.81958638E-9-1.06434419E-13 2

-4.52873003E4 -1.3597571E2 1.40912479E0 1.10720834E-1 -8.71178075E-5 3

3.63662749E-8-6.28350689E-12 -3.46304788E4 3.16223383E1 4

C7H14OOH4-2O2 -0-TRMH 15O 4C 7 G 300.0 5000.0 1390.0 1

3.28358296E1 3.32767285E-2 -1.15833285E-5 1.81958638E-9-1.06434419E-13 2

-4.52873003E4 -1.3597571E2 1.40912479E0 1.10720834E-1 -8.71178075E-5 3

3.63662749E-8-6.28350689E-12 -3.46304788E4 3.16223383E1 4

C7H14O1-3 -THERMH 14O 1C 7 G 300.0 5000.0 1395.0 1

2.26918916E1 3.32510472E-2 -1.14457765E-5 1.78455535E-9-1.03841112E-13 2

-3.41591419E4 -9.46346563E1 -5.5003645E0 1.00155088E-1 -7.29935857E-5 3

2.7934427E-8-4.42245696E-12 -2.44292287E4 5.64768482E1 4

C7H14O1-4 -THERMH 14O 1C 7 G 300.0 5000.0 1398.0 1

2.20530468E1 3.4054123E-2 -1.16873054E-5 1.81862696E-9 -1.0568027E-13 2

-4.41822326E4 -9.24677192E1 -6.56017746E0 1.0069452E-1 -7.10466567E-5 3

2.59142094E-8-3.86849843E-12 -3.42312152E4 6.12629813E1 4

C7H14O2-4 -THERMH 14O 1C 7 G 300.0 5000.0 1399.0 1

2.32692731E1 3.25585391E-2 -1.11624906E-5 1.73573658E-9-1.00813215E-13 2

-3.64349664E4 -9.79457278E1 -5.39477206E0 1.01846577E-1 -7.60046236E-5 3

2.9653802E-8 -4.7485437E-12 -2.67118295E4 5.51731319E1 4

C7H14O2-5 -THERMH 14O 1C 7 G 300.0 5000.0 1399.0 1

2.26707471E1 3.34803352E-2 -1.14785395E-5 1.78491428E-9-1.03671828E-13 2

-4.65307741E4 -9.61517004E1 -7.24295043E0 1.05687256E-1 -7.87952366E-5 3

3.05899677E-8-4.86103477E-12 -3.63891669E4 6.36525527E1 4

C7H14O3-5 -THERMH 14O 1C 7 G 300.0 5000.0 1399.0 1

2.32692731E1 3.25585391E-2 -1.11624906E-5 1.73573658E-9-1.00813215E-13 2

-3.64349664E4 -9.79457278E1 -5.39477206E0 1.01846577E-1 -7.60046236E-5 3

2.9653802E-8 -4.7485437E-12 -2.67118295E4 5.51731319E1 4

NC7KET13 -THERMH 14O 3C 7 G 300.0 5000.0 1388.0 1

2.90744507E1 3.17177458E-2 -1.10262646E-5 1.73053608E-9-1.01161699E-13 2

-5.82345477E4 -1.18064324E2 2.21629328E0 9.47373762E-2 -6.90473651E-5 3

2.678204E-8-4.36392181E-12 -4.8796551E4 2.63157133E1 4

NC7KET24 -THERMH 14O 3C 7 G 300.0 5000.0 1387.0 1

2.88330388E1 3.20168096E-2 -1.11508456E-5 1.75226159E-9-1.02520451E-13 2

-6.20142474E4 -1.17499704E2 1.52936692E0 9.58173466E-2 -6.9668852E-5 3

2.69540382E-8-4.38728126E-12 -5.23839542E4 2.93851334E1 4

NC7KET25 -THERMH 14O 3C 7 G 300.0 5000.0 1387.0 1

2.88330388E1 3.20168096E-2 -1.11508456E-5 1.75226159E-9-1.02520451E-13 2

-6.20142474E4 -1.17499704E2 1.52936692E0 9.58173466E-2 -6.9668852E-5 3

2.69540382E-8-4.38728126E-12 -5.23839542E4 2.93851334E1 4

NC7KET31 -THERMH 14O 3C 7 G 300.0 5000.0 1384.0 1

2.80739929E1 3.26743194E-2 -1.13798765E-5 1.7881929E-9-1.04618326E-13 2

-5.95401535E4 -1.12628648E2 2.77522939E0 9.05308437E-2 -6.36476024E-5 3

2.42107778E-8-3.94769763E-12 -5.04144221E4 2.40464052E1 4

NC7KET35 -THERMH 14O 3C 7 G 300.0 5000.0 1387.0 1

2.88330388E1 3.20168096E-2 -1.11508456E-5 1.75226159E-9-1.02520451E-13 2

-6.20142474E4 -1.17499704E2 1.52936692E0 9.58173466E-2 -6.9668852E-5 3

2.69540382E-8-4.38728126E-12 -5.23839542E4 2.93851334E1 4

NC7KET42 -THERMH 14O 3C 7 G 300.0 5000.0 1386.0 1

2.86572867E1 3.21567908E-2 -1.1196157E-5 1.75895E-9 -1.0289196E-13 2

-6.20252988E4 -1.16135256E2 2.32269738E0 9.45160149E-2 -6.99057179E-5 3

2.79772916E-8-4.74244431E-12 -5.2758683E4 2.53458269E1 4

NC4H9COCH2 -THERMH 11O 1C 6 G 300.0 5000.0 1387.0 1

1.98575871E1 2.5240637E-2 -8.72522623E-6 1.36422047E-9-7.95374883E-14 2

-2.20531958E4 -7.71140999E1 6.57240675E-1 6.91820222E-2 -4.79956182E-5 3

1.78114857E-8-2.80456388E-12 -1.51806661E4 2.65180216E1 4

C4H7OOH1-4 -THERMH 8O 2C 4 G 300.0 5000.0 1393.0 1

1.66978343E1 1.80578399E-2 -6.22476839E-6 9.71479434E-10-5.65686551E-14 2

-1.8534472E4 -5.76609547E1 1.7980467E0 5.23302551E-2 -3.64638246E-5 3

1.31971888E-8-1.97165993E-12 -1.32846748E4 2.25862038E1 4

C4H7O1-4 -THERMH 7O 1C 4 G 300.0 5000.0 1393.0 1

1.31417783E1 1.64166051E-2 -5.56949199E-6 8.60114769E-10-4.97230006E-14 2

1.67967537E3 -4.16160087E1 -2.92647947E-1 4.83149119E-2 -3.4813322E-5 3

1.31921468E-8-2.06485553E-12 6.29978883E3 3.03629978E1 4

C5H9OOH1-4 -THERMH 10O 2C 5 G 300.0 5000.0 1397.0 1

2.0217995E1 2.21511744E-2 -7.60711244E-6 1.18420679E-9-6.88331594E-14 2

-2.44297406E4 -7.58287543E1 7.6778233E-1 6.93519317E-2 -5.21650213E-5 3

2.06237355E-8-3.35844189E-12 -1.78318101E4 2.80373555E1 4

C5H9O1-4 -THERMH 9O 1C 5 G 300.0 5000.0 1398.0 1

1.66809382E1 2.07591828E-2 -7.09289768E-6 1.10031617E-9-6.37992567E-14 2

-4.67568455E3 -5.95056483E1 -8.53018802E-1 6.41880432E-2 -4.91931508E-5 3

2.00188214E-8-3.35963237E-12 1.19509504E3 3.38333616E1 4

C5H9OOH1-5 -THERMH 10O 2C 5 G 300.0 5000.0 1393.0 1

1.98575596E1 2.25572969E-2 -7.76951451E-6 1.21189491E-9-7.05404248E-14 2

-2.26275637E4 -7.31968346E1 1.65166493E0 6.41855434E-2 -4.42152137E-5 3

1.58117718E-8-2.33469388E-12 -1.61856012E4 2.49485316E1 4

C5H9O1-5 -THERMH 9O 1C 5 G 300.0 5000.0 1394.0 1

1.62564642E1 2.10561226E-2 -7.18323965E-6 1.11331434E-9-6.45162851E-14 2

-2.41003213E3 -5.69404193E1 -6.08379884E-1 6.09139191E-2 -4.3639512E-5 3

1.64966933E-8-2.58694444E-12 3.42450558E3 3.35104649E1 4

C6H101-3 H 10C 6 G 300.0 5000.0 1396.0 1

1.72274136E1 2.28968868E-2 -7.8417692E-6 1.21837034E-9-7.07190802E-14 2

-1.6497853E3 -6.63069861E1 -2.38507596E0 7.30622234E-2 -5.86808335E-5 3

2.52424911E-8 -4.468201E-12 4.80385112E3 3.7610446E1 4

C6H101-4 H 10C 6 G 300.0 5000.0 1396.0 1

1.72274136E1 2.28968868E-2 -7.8417692E-6 1.21837034E-9-7.07190802E-14 2

-1.6497853E3 -6.63069861E1 -2.38507596E0 7.30622234E-2 -5.86808335E-5 3

2.52424911E-8 -4.468201E-12 4.80385112E3 3.7610446E1 4

C6H102-4 H 10C 6 G 300.0 5000.0 1396.0 1

1.72274136E1 2.28968868E-2 -7.8417692E-6 1.21837034E-9-7.07190802E-14 2

-1.6497853E3 -6.63069861E1 -2.38507596E0 7.30622234E-2 -5.86808335E-5 3

2.52424911E-8 -4.468201E-12 4.80385112E3 3.7610446E1 4

ETES1 H 10O 1C 6 G 300.0 5000.0 1401.0 1

1.91884587E1 2.42677667E-2 -8.33134636E-6 1.29673623E-9-7.53674415E-14 2

-1.54455993E4 -7.73983087E1 -5.96655202E0 8.90553981E-2 -7.35045234E-5 3

3.1493208E-8-5.45546649E-12 -7.32232871E3 5.55446829E1 4

C6H112O2-4 H 11O 2C 6 G 300.0 5000.0 1389.0 1

2.13545199E1 2.65647098E-2 -9.19147506E-6 1.43790977E-9-8.38625367E-14 2

-1.00291675E4 -8.04485096E1 7.0924151E-1 7.61167882E-2 -5.65441627E-5 3

2.28626264E-8-3.90914815E-12 -2.83646907E3 3.022068E1 4

C6H112O2-5 H 11O 2C 6 G 300.0 5000.0 1389.0 1

2.11830704E1 2.66691844E-2 -9.21827673E-6 1.441121E-9-8.40098554E-14 2

-1.04865774E4 -7.92293261E1 8.61603309E-1 7.49248603E-2 -5.46729053E-5 3

2.16848199E-8 -3.6461171E-12 -3.36167444E3 2.9876444E1 4

C6H102OOH5-4 H 11O 2C 6 G 300.0 5000.0 1390.0 1

2.32752685E1 2.51409461E-2 -8.74931155E-6 1.37423314E-9-8.03786732E-14 2

-1.2693336E4 -9.35010174E1 -4.02203129E-1 8.18778797E-2 -6.19069792E-5 3

2.45652582E-8-4.03514422E-12 -4.54420456E3 3.32729123E1 4

C6H102OOH4-5 H 11O 2C 6 G 300.0 5000.0 1386.0 1

2.32398122E1 2.41563455E-2 -8.28585057E-6 1.28951635E-9-7.49613636E-14 2

-5.56292849E3 -8.89426926E1 5.82697759E-1 7.69938922E-2 -5.55576336E-5 3

2.06590703E-8-3.14739197E-12 2.31656586E3 3.27785094E1 4

N 120186N 1 G 300.0 5000.0 1000.0 1

2.450268E0 1.066146E-4 -7.465337E-8 1.879652E-11 -1.025984E-15 2

5.611604E4 4.448758E0 2.503071E0 -2.180018E-5 5.420529E-8 3

-5.64756E-11 2.099904E-14 5.60989E4 4.167566E0 4

N2O 121286O 1N 2 G 300.0 5000.0 1000.0 1

4.718977E0 2.873714E-3 -1.197496E-6 2.250552E-10 -1.575337E-14 2

8.165811E3 -1.65725E0 2.543058E0 9.492193E-3 -9.792775E-6 3

6.263845E-9 -1.901826E-12 8.7651E3 9.511222E0 4

NO 121286O 1N 1 G 300.0 5000.0 1000.0 1

3.245435E0 1.269138E-3 -5.01589E-7 9.169283E-11 -6.275419E-15 2

9.80084E3 6.417294E0 3.376542E0 1.253063E-3 -3.302751E-6 3

5.21781E-9 -2.446263E-12 9.817961E3 5.82959E0 4

NO2 121286O 2N 1 G 300.0 5000.0 1000.0 1

4.682859E0 2.462429E-3 -1.042259E-6 1.976902E-10 -1.391717E-14 2

2.261292E3 9.885985E-1 2.6706E0 7.838501E-3 -8.063865E-6 3

6.161715E-9 -2.32015E-12 2.896291E3 1.161207E1 4

END
